# Supplementary material for: Bi-modal stimulation in the treatment of tinnitus: a study protocol for an exploratory trial to optimise stimulation parameters and patient subtyping
Source: PubMed Central journal article supplement — BMJ Open. 2017 Oct 25;7(10):e018465. doi: 10.1136/bmjopen-2017-018465 (PMC5665258; doi:10.1136/bmjopen-2017-018465), 2017-10-25
Supplement: bmjopen-2017-018465.draft_revisions.pdf [file bmjopen-2017-018465.draft_revisions.pdf]

# BMJ Open

BMJ Open is committed to open peer review. As part of this commitment we make the peer review history of every article we publish publicly available.

When an article is published we post the peer reviewers' comments and the authors' responses online. We also post the versions of the paper that were used during peer review. These are the versions that the peer review comments apply to.

The versions of the paper that follow are the versions that were submitted during the peer review process. They are not the versions of record or the final published versions. They should not be cited or distributed as the published version of this manuscript.

BMJ Open is an open access journal and the full, final, typeset and author-corrected version of record of the manuscript is available on our site with no access controls, subscription charges or pay-per-view fees (<http://bmjopen.bmj.com>).

If you have any questions on BMJ Open's open peer review process please email [editorial.bmjopen@bmj.com](mailto:editorial.bmjopen@bmj.com)

# BMJ Open

## Bi-modal stimulation in the treatment of tinnitus: a study protocol for an exploratory trial to optimise stimulation parameters and patient subtyping

|                                 |                                                                                                                                                                                                                                                                                                                                                                   |
|---------------------------------|-------------------------------------------------------------------------------------------------------------------------------------------------------------------------------------------------------------------------------------------------------------------------------------------------------------------------------------------------------------------|
| Journal:                        | <i>BMJ Open</i>                                                                                                                                                                                                                                                                                                                                                   |
| Manuscript ID                   | bmjopen-2017-018465                                                                                                                                                                                                                                                                                                                                               |
| Article Type:                   | Protocol                                                                                                                                                                                                                                                                                                                                                          |
| Date Submitted by the Author:   | 04-Jul-2017                                                                                                                                                                                                                                                                                                                                                       |
| Complete List of Authors:       | D'Arcy, Shona; Neuromod Devices, ; Hamilton, Caroline; Neuromod Devices Hughes, Stephen; Neuromod Devices Hall, Deborah; University of Nottingham, NIHR Nottingham Hearing Biomedical Research Unit Vanneste, Sven; University of Texas at Dallas Langguth, Berthold ; University of Regensburg at the District Hospital Conlon, Brendan; St. James Hospital, ENT |
| <b>Primary Subject Heading</b>: | Neurology                                                                                                                                                                                                                                                                                                                                                         |
| Secondary Subject Heading:      | Ear, nose and throat/otolaryngology, Neurology                                                                                                                                                                                                                                                                                                                    |
| Keywords:                       | Tinnitus, Neuromodulation, Bi-modal stimulation                                                                                                                                                                                                                                                                                                                   |
|                                 |                                                                                                                                                                                                                                                                                                                                                                   |

SCHOLARONE™  
Manuscripts

only

1  
2  
3 **Bi-modal stimulation in the treatment of tinnitus: a study protocol for an exploratory**  
4 **trial to optimise stimulation parameters and patient subtyping**  
5  
6  
7  
8  
9

10  
11  
12 Authors: Shona D'Arcy<sup>1</sup>, Caroline Hamilton<sup>1</sup>, Stephen Hughes<sup>1</sup>, Deborah A Hall<sup>2,3</sup>, Sven  
13 Vanneste<sup>4</sup>, Berthold Langguth<sup>5,6</sup>, Brendan Conlon<sup>1,7,8</sup>  
14  
15  
16  
17  
18  
19

- 20 1. Neuromod Devices Limited, Dublin, Republic of Ireland  
21  
22 2. National Institute for Health Research Nottingham Biomedical Research Centre, UK  
23  
24 3. Otology and Hearing group, Division of Clinical Neuroscience, University of Nottingham,  
25 UK  
26  
27 4. Lab for Clinical and Integrative Neuroscience, School of Behavioral and Brain Sciences,  
28 The University of Texas at Dallas, USA  
29  
30 5. Department of Psychiatry and Psychotherapy, University of Regensburg, Regensburg,  
31 Germany  
32  
33 6. Interdisciplinary Tinnitus Center of the University of Regensburg, Regensburg, Germany  
34  
35 7. Tallaght Hospital and St. James's Hospital, Dublin, Republic of Ireland  
36  
37 8. Department of Medicine, Trinity College, Dublin, Republic of Ireland  
38  
39  
40  
41  
42  
43  
44

45 **Running Title:** Bi-modal stimulation in the treatment of tinnitus  
46

47 **Keywords:** Tinnitus, Bi-modal stimulation, neuromodulation  
48  
49  
50  
51  
52  
53  
54

55 **Correspondence to:** shona.darcy@neuromoddevices.com  
56  
57  
58  
59  
60

## ABSTRACT

**Introduction:** Tinnitus is the perception of sound in the absence of a corresponding external acoustic stimulus. Bi-modal neuromodulation is emerging as a promising treatment for this condition. The main objectives of this study are to investigate the relevance of inter-stimuli timing and the choice of auditory stimuli for a proprietary bi-modal (auditory and somatosensory) neuromodulation device and to explore whether specific subtypes of patients are differentially responsive to this novel intervention for reducing the symptoms of chronic tinnitus.

**Methods and analysis:** This is a two-site, randomised, triple-blind, exploratory study of a proprietary neuromodulation device with a pre-post and 12-month follow-up design. Three different bi-modal stimulation parameter sets will be examined. The study will enrol 342 patients, split 80:20 between two sites (Dublin, Ireland and Regensburg, Germany), to complete 12 weeks of treatment with the device. Patients will be allocated to one of three arms using a step-wise stratification according to four binary categories: tinnitus tonality, sound level tolerance (using Loudness Discomfort Level of <60 dB SL as an indicator for hyperacusis), hearing thresholds, and presence of a noise-induced audiometric profile. The main indicators of relative clinical efficacy for the three different parameter sets are two patient-reported outcomes measures, the Tinnitus Handicap Inventory and the Tinnitus Functional Index, after 12 weeks of intervention. Clinical efficacy will be further explored in a series of patient subtypes, split by the stratification variables and by presence of a somatic tinnitus. Evidence for sustained effects on the psychological and functional impact of tinnitus will be followed up for 12 months. Safety data will be collected and reported. A number of feasibility measures to inform future trial design include: reasons for exclusion, completeness of data collection, attrition rates, patient's adherence to the device usage as per manufacturer's instructions and evaluation of alternative methods for estimating tinnitus impact and tinnitus loudness.

**Ethics and dissemination:** This study protocol is approved by the Tallaght Hospital / St. James's Hospital Joint Research Ethics Committee in Dublin, Republic of Ireland, and by the

1  
2  
3 Ethics Committee of the University Clinic Regensburg, Germany. Findings will be  
4  
5 disseminated to relevant research, clinical, health service and patient communities through  
6  
7 publications in peer-reviewed and popular science journals and presentations at scientific  
8  
9 and clinical conferences.

10  
11 **Trial registration number;** the trial is registered on ClinicalTrials.gov (NCT02669069). The  
12  
13 sponsor is Neuromod Devices, Dublin, Republic of Ireland.

#### 14 15 **STRENGTHS AND LIMITATIONS OF THIS STUDY**

- 16  
17  
18 • The main strength of this study is that it is a large two-site, triple-blinded, randomised  
19  
20 trial that will provide exploratory evidence of the relevance of stimulation parameters  
21  
22 on the clinical efficacy of different bi-modal stimulation parameters and will inform  
23  
24 future trial design.
- 25  
26 • The study comprehensively characterises patients for subtyping and this will refine  
27  
28 candidature for the intervention.
- 29  
30 • Among the limitations of this study are the variability in duration between screening  
31  
32 and enrolment and the selection of the investigated stimulation parameters.
- 33  
34 • The online recruitment process may inadvertently introduce participant selection bias.  
35  
36  
37  
38  
39  
40  
41  
42  
43  
44  
45  
46  
47  
48  
49  
50  
51  
52  
53  
54  
55  
56  
57  
58  
59  
60

## INTRODUCTION

Tinnitus is the perception of sound in the absence of a corresponding external acoustic stimulus. The condition is most commonly referred to as 'ringing in the ears' but symptoms can manifest as buzzing, hissing or sizzling. Tinnitus often coincides with hearing loss and it is commonly believed that hearing loss may be a contributory factor (1). While the exact mechanisms responsible for tinnitus are yet to be fully elucidated, it is believed that the reduction in peripheral auditory input, due to hearing loss, results in pathological behaviours that are misinterpreted as sound within the central auditory systems (2).

Tinnitus has traditionally been treated by means of acoustic stimulation with limited success (3). Systematic reviews highlight a lack of double-blind, randomised, controlled studies or quality clinical evidence supporting the efficacy of acoustic stimulation in treating tinnitus (4). This has led researchers to investigate approaches to treating tinnitus that go beyond acoustic stimulation.

One approach that has been increasingly investigated in the last decade is invasive and non-invasive neuromodulation of brain structures and networks involved in tinnitus generation (5, 6). Neuromodulation is defined as the process of inhibition, stimulation, modification, regulation, or alteration of electrical activity in the central, peripheral, or autonomic nervous systems (7). It is the science of how electrical stimulation can modulate nervous system functionality for therapeutic benefit.

To date, a limited number of uncontrolled pilot studies have been conducted to assess the safety and initial efficacy of neuromodulation employing cranial nerve stimulation for tinnitus treatment in humans. These have included invasive vagus nerve stimulation (VNS) (8), non-invasive stimulation of the vagus nerve (9, 10) and non-invasive Cervico-Trigeminal Nerve Stimulation (CTNS) (11, 12). While VNS demonstrated promising results in animals (13), human studies have demonstrated mixed results (8, 14, 10). Human studies using non-invasive CTNS have demonstrated promising initial efficacy (11, 12). However, these results should be considered preliminary as the data stems from small pilot studies. The intervention evaluated by Hamilton and colleagues (2016) utilised synchronised auditory and

1  
2  
3 somatosensory stimulation. However, recent animal research suggests that inter-stimuli  
4 timing intervals may play an important part in the effectiveness of bi-modal auditory and  
5 somatosensory stimulation on tinnitus (15). This theory is supported by the findings of a  
6 recent 20-patient human pilot study (12). Similarly, there is debate in the literature about the  
7 choice of auditory stimuli and whether this should stimulate frequency channels associated  
8 with sensorineural hearing loss (CTNS approach) or frequency channels not associated with  
9 hearing loss (VNS approach) (8, 12). Progression to randomised, controlled trials (RCT) with  
10 adequately powered sample size is needed. This study protocol represents the first  
11 important step towards that goal.  
12  
13  
14  
15  
16  
17  
18  
19  
20  
21  
22  
23  
24

### 25 **Hypothesis and aims**

26  
27  
28 The main objectives of the study described here are to investigate the relevance of inter -  
29 and intra - stimuli timing and the choice of auditory stimulation in order to optimise bi-modal  
30 stimulation parameters for this treatment. Exploratory analyses will be conducted to  
31 investigate whether subtypes of patients are differentially responsive to this novel  
32 intervention. Safety data will also be collected and reported. Additional feasibility outcomes  
33 concern methodological and procedural uncertainties when this novel medical device is  
34 prescribed and fitted in a large sample of patients.  
35  
36  
37  
38  
39  
40  
41  
42  
43  
44

## 45 **METHODS AND ANALYSIS**

### 46 **Trial design**

47  
48  
49 The Treatment Evaluation of Neuromodulation for Tinnitus (TENT) study is a two-site,  
50 randomised, triple-blind, exploratory study examining three different bi-modal stimulation  
51 parameter sets. The treatment duration is 12-weeks and patients are followed up at 6 weeks,  
52 6 months and 12 months post treatment cessation. TENT will be conducted at two sites:  
53  
54  
55  
56  
57  
58  
59  
60

1  
2  
3 Wellcome Trust-HRB Clinical Research Facility, St. James's Hospital, Dublin, Ireland and  
4  
5 Tinnituszentrum Regensburg, University of Regensburg, Germany. The protocol was  
6  
7 independently reviewed and approved by Research Ethics Committees of the Tallaght  
8  
9 Hospital/St James' Hospital (Ref: 2016-03-List 11(3)) and the University Clinic Regensburg  
10  
11 (Ref: 16-101-0186). The trial sponsor is Neuromod Devices Limited. The trial was registered  
12  
13 on ClinicalTrials.gov on 27 January 2016 (Identifier: NCT02669069). The first patient was  
14  
15 consented in 22 March 2016 with the last visit planned for May 2018. Our reporting follows  
16  
17 standard protocol items for clinical trials defined in the SPIRIT 2013 Statement (16).  
18  
19

### 20 21 Eligibility criteria

22 Eligible patients will be aged 18-70 years at screening; self-report having experienced  
23  
24 tinnitus for more than 3 months and less than 5 years; score between 28 and 76 points on  
25  
26 the Tinnitus Handicap Inventory (THI), have a Minimum Masking Level (MML) measurement  
27  
28 between 20-80 decibels Hearing Level (dB HL), be able to read and understand English or  
29  
30 German (depending on the recruiting centre) and be willing to commit to the duration of the  
31  
32 programme.  
33

34  
35 Potential patients will be excluded if they have pulsatile tinnitus (rhythmical sounds that often  
36  
37 beat in time with the heartbeat), tinnitus caused by head or neck injury, or tinnitus resulting  
38  
39 from any other neurological condition. Signs of a conductive hearing loss demonstrated by  
40  
41 abnormal otoscopy or tympanometry are exclusion criteria; as is a sensorineural hearing  
42  
43 loss in either ear of greater than 40 dB HL in at least in one measurement frequency in the  
44  
45 range 0.25-1.00 kHz, or of greater than 80 dB HL in at least one measurement frequency in  
46  
47 the range 2.0-8.0 kHz. Exclusions also include those patients who began wearing a hearing  
48  
49 aid within the last 90 days, those with any type of electro-active implantable device (e.g.  
50  
51 vagal nerve stimulator, cochlear implant or a cardio-pacemaker) and those with the following  
52  
53 conditions that can be co-morbid with tinnitus: Ménière's disease, Loudness Discomfort  
54  
55 Level for sounds presented below 30 dB Sensation Level (SL), Temporomandibular Joint  
56  
57 disorder (TMJ) and anxiety determined by a score greater than 120 out of 160 on the State-  
58  
59  
60



1  
2  
3 Trait Anxiety Inventory (STAI) (17, 18). Moderate to severe dementia as indicated by a score  
4 below 20 on the Mini-Mental State Examination (MMSE) (19) will also be sufficient reason  
5 for exclusion. A final set of exclusion criteria based on medical history taken at the  
6 screening assessment are: oral piercings, pregnancy, involvement in medico-legal cases,  
7 history of auditory hallucinations, any current neurological conditions that may lead to loss of  
8 consciousness (e.g. epilepsy), current prescription of any drug for a central nervous system  
9 pathology and previous use of bi-modal neuromodulation devices.  
10  
11  
12  
13  
14  
15  
16

### 17 **Intervention**

18 All enrolled patients will receive a proprietary bi-modal auditory and somatosensory  
19 neuromodulation device (MBT, Neuromod Devices Ltd., Dublin, Ireland), a CE-marked Class  
20 IIa medical device. Auditory stimulation is delivered through high-fidelity circumaural  
21 headphones, and comprises of a mixture of a wideband noise and sequences of pure tones.  
22 Stimulation of the somatosensory system is delivered electrically using an array of 32  
23 transmucosal electrodes on the tongue. Somatosensory stimulation is delivered in the form  
24 of bi-phasic anodic pulses of between 5 and 130 $\mu$ s duration and fixed amplitude. The  
25 somatosensory stimulator is arranged so that there is a unique mapping between each  
26 electrode in the array and frequencies in the tone sequence. The stimuli for each parameter  
27 set across the three arms are outlined in Table 1.  
28  
29  
30  
31  
32  
33  
34  
35  
36  
37  
38  
39

40 The auditory stimulus intensity is configured uniquely based on each patient's pure-tone  
41 audiometric thresholds in the range 0.25 to 8 kHz, and the patient is afforded limited control  
42 over the auditory stimulus intensity of -12 dB to +12 dB in 2 dB steps during treatment. For  
43 patients with greater than 70 dB HL hearing loss at any frequency, the upper bound of  
44 stimulus intensity control is limited for reasons of safety noise dosage. The treatment device  
45 reverts to the default stimulus intensities at the start of each new treatment session. Any  
46 adjustments made by the patients to the stimulus intensities are logged in the device's  
47 memory for subsequent analysis.  
48  
49  
50  
51  
52  
53  
54  
55  
56  
57  
58  
59  
60

1  
2  
3 The somatosensory stimulus intensity is configured for each patient at enrolment, based on  
4 a calibration procedure that ascertains the patient's threshold of perception. The patient is  
5 also afforded limited control over the somatosensory stimulus intensity during treatment.  
6  
7

8  
9 The device logs the time and date on which the device is in use by the patient, the duration  
10 that the electrode array is in contact with the tongue, and the intensities of both stimuli.  
11

12 Individually configured devices will be delivered to the investigator sites with a patient's  
13 Unique Identifier Code (UIC) numbers marked on each device and its accessories.  
14  
15 Investigators will be extensively trained on fitting the device and instructing patients on its  
16 use, per the manufacturer's instructions. Patients will be provided with a quick start guide, an  
17 Instructions for Use (IFU) manual and a link to an instructional video. Before leaving the  
18 clinical sites, patients will complete a 30-minute supervised treatment session to ensure they  
19 are comfortable using the device.  
20  
21  
22  
23  
24  
25  
26  
27  
28

### 29 Outcomes

30 Subjective clinical outcome measures to assess tinnitus impact, are the Tinnitus Handicap  
31 Index (THI) (20) and the Tinnitus Functional Index (TFI) (21). The THI provides a measure of  
32 the psychological impact of tinnitus, 25 items are scored 4/2/0 on a categorical scale  
33 corresponding to yes/sometimes/no. The global score of the THI has a value between 0 and  
34 100 with the higher scores indicating greater emotional distress. The TFI assesses a range  
35 of functional complaints experienced over the past week (22). Each of the 25 items is  
36 assessed on an 11 point Likert scale, the sum of the scores is normalised to give a global  
37 score between 0 to 100, with higher scores indicating greater negative functional impact of  
38 tinnitus.  
39

40 Tinnitus loudness is assessed by MML, Tinnitus Loudness Matching (TLM) and Visual  
41 Analogue Scale (VAS). MML is a psychoacoustic estimate of the lowest level of broadband  
42 noise required to minimally mask the patient's tinnitus (23). The stimulus is normally  
43 presented ipsilaterally (tinnitus ear), or if tinnitus is present in both ears the stimulus is  
44 presented binaurally or to the ear with the predominate sound. TLM is assessed by  
45  
46  
47  
48  
49  
50  
51  
52  
53  
54  
55  
56  
57  
58  
59  
60

1  
2  
3 presenting a 1-kHz tone (24) contralateral to the predominant tinnitus ear or if tinnitus is  
4  
5 equally loud in both sides or localised in the head, the stimuli will be presented to the ear  
6  
7 with better hearing or randomly selected. The stimulus is increased in 1 dB increments until  
8  
9 the patient confirms that it is equal in loudness to their tinnitus. Finally, a VAS will be  
10  
11 employed for patients to rate the current loudness of their tinnitus, with zero equating to 'not  
12  
13 loud at all' and ten equating to 'extremely loud', as the endpoints anchors (25).

14  
15 Safety data on Adverse Events (AEs) and Serious Adverse Events (SAEs) will be captured  
16  
17 throughout the trial. An AE is defined as any unfavourable and unintended sign, symptom or  
18  
19 disease, temporarily that may or may not be related to the medical device. It will be rated as  
20  
21 minor, major or serious and related or unrelated to the device by the TENT Medical Review  
22  
23 Board. An SAE is defined as an AE that led or might have led to the death or serious  
24  
25 deterioration in the state of health of a patient Treatment-related AEs are those judged by  
26  
27 the Principal Investigator at each site to be possibly caused by the treatment under  
28  
29 investigation. The Principal Investigator will remain vigilant for signs of possible treatment-  
30  
31 related changes in oral health (e.g. irritations in the oral cavity or discomfort between the  
32  
33 tongue tip and dental retainers or metal fillings), and the impact of tinnitus (indicated by the  
34  
35 THI and TFI).

36  
37 Stopping criteria are defined as patients demonstrating a worsening in THI and MML of an  
38  
39 increase in THI of 7pts and an increase in MML of 5.3dB. Treatment-related changes in  
40  
41 hearing thresholds that are considered an AE are a deterioration from Screening to Endpoint  
42  
43 of 15 dB in a minimum of two adjacent test frequencies (0.25-8 kHz) in either ear that cannot  
44  
45 be explained by conductive hearing problem or a recent excessive noise exposure.

46  
47 Additionally, feasibility outcomes include: reasons for exclusion at the screening visit,  
48  
49 number of patients who were eligible at the screening appointment but declined to  
50  
51 participate further, number of patient withdrawals after device fitting, proportion of incomplete  
52  
53 patient datasets at each scheduled visit, patients' compliance with the device usage as per  
54  
55 manufacturer's instructions and comparisons of alternative methods for measuring the  
56  
57 impact of tinnitus and for estimating tinnitus loudness.  
58  
59  
60

1  
2  
3 Compliance data will be extracted from log files saved on the device. For feasibility analysis,  
4 compliance rate will be expressed as a percentage of logged usage relative to i) the  
5 expected compliance as per the intended use for the device (a total of 84 hours over the 12-  
6 week period), and to a pre-defined minimum acceptable compliance threshold (defined as at  
7 least 3 hours average usage within a 1-week period, corresponding to a sum total of 36  
8 hours of treatment).  
9  
10  
11  
12  
13  
14

### 15 16 17 **Recruitment**

18  
19 Patients are primarily recruited via media advertising and dedicated trial websites in both  
20 clinical locations. Advertisements on regional and national radio stations and in regional and  
21 national newspapers invite individuals with tinnitus, who are interested in participating in a  
22 clinical study for tinnitus, to register their interest on dedicated recruitment websites. The  
23 recruitment website provides information on the study and how to proceed with registration.  
24  
25 Once they register their interest, candidates will be provided with a UIC and an  
26 accompanying Personal Identification Number and be directed to an eligibility assessment  
27 website. The eligibility assessment comprises of an online survey, hosted by SurveyGizmo,  
28 where those interested can find out about the requirements of participating in the study.  
29  
30 Candidates answer a scripted set of general pre-screening questions on age, duration of  
31 tinnitus, oral piercings, other current medical conditions including temporomandibular joint  
32 disorder and Ménière's disease and involvement in medico-legal cases. This is not part of  
33 the formal screening because no personal or medical details will be taken, but it is intended  
34 to manage the large numbers of candidates expected to respond to the advertising  
35 campaign and anticipated high screen failure rate. Candidates who meet the inclusion  
36  
37 criteria at this stage will be provided with a Patient Information Leaflet and Informed Consent  
38 via email or post and invited to a screening visit at the local site.  
39  
40  
41  
42  
43  
44  
45  
46  
47  
48  
49  
50  
51  
52  
53  
54  
55  
56  
57  
58  
59  
60

### Patient timeline

The schedule of clinical research activities is illustrated in Table 2 and briefly comprises of seven visits to the clinical site, plus two telephone calls during the period of device usage.

The various assessments are completed by a multi-disciplinary team including: Audiologists, Medical Doctors, Physiotherapist, Research Nurses and Research Associates.

The initial objective of the Screening visit is to obtain written informed consent, to determine whether the patient satisfies the remaining eligibility criteria and to obtain initial outcome measures, patient characteristics and audiological profile. This information is employed in the subtype classification of patients, the stratified random allocation process and for device configuration, described below.

At the Enrolment and device fitting visit, a Physiotherapist (Dublin) or Medical Doctor (Regensburg) conducts a comprehensive assessment comprising of a set of 25 pre-defined cranial manipulations designed to diagnose somatic tinnitus (26). We define somatic tinnitus where a patient reports that at least one of the somatic manipulations reliably produces a change in the psychoacoustic characteristics of their tinnitus (e.g. in pitch, loudness, localisation, temporal properties etc). Assessments of outcome measures are repeated at the Enrolment visit. Other elements of the visit include an oral health examination and device training and deployment. After completing an on-site supervised treatment session, patients return home and self-administer the treatment. Patients will be instructed to use the device for two daily 30-minute sessions over a 12-week period. These sessions can be continuous or at different times of the day.

Assessment of outcome measures and safety information are collected at the Interim visit, half way through the 12-week treatment. Compliance will also be assessed and reviewed at the Interim visit. Investigators will review the device usage log. Patients with acceptable compliance will be encouraged to continue and patients with poor compliance will be encouraged to improve. Compliance phone calls will be conducted at weeks 3 and 9 to

1  
2  
3 encourage patients to continue with device usage and address any technical issues that  
4 patients may be having.

5  
6  
7 The purpose of the End-point visit is to repeat outcome measures assessments, the oral  
8 health examination, an exit interview and retrieve the device. Three follow-up visits will be  
9 conducted to assess the post cessation effects of this intervention.  
10  
11  
12

### 13 14 15 Sample size

16  
17  
18 The study is powered for a between-arm clinically significant difference in the mean THI  
19 scores from Baseline to End-point, where the reported clinically significant change in THI is 7  
20 points (27). The assumed sample standard deviation is 12.7 points, as elucidated from a  
21 previous study using similar technology (11), resulting in an effect size of 0.55. The sample  
22 size calculations were performed using Matlab 2016a, assuming a two-sided significance  
23 level of 0.016 (0.05 split equally between the three inter-arm pairwise t-tests), and power of  
24 90%, resulting in a total of 91 patients to be enrolled in each treatment arm, or 114 patients  
25 per arm to account for an expected drop-out rate of 20%. In total, 342 patients will be  
26 required across the three arms of the study, split 80:20 between the Dublin and Regensburg  
27 sites respectively.  
28  
29  
30  
31  
32  
33  
34  
35  
36  
37  
38  
39  
40  
41  
42

### 43 44 Allocation

45 Eligible patients will be randomised, in equal proportions, between the three parallel arms at  
46 the device configuration site by members of the technical team, not investigators (see Figure  
47 1). Stratified randomisation will be performed to balance the influence of several baseline co-  
48 variates in the post-hoc analyses. The stratification co-variates are chosen based on the  
49 investigator's research objectives, namely to elucidate relative treatment effects on tinnitus  
50 patients with varying underlying characteristics. Allocation of patients will be stratified across  
51 the three intervention arms according to four binary categories applied in a step-wise  
52  
53  
54  
55  
56  
57  
58  
59  
60

1  
2  
3 manner: i) tinnitus tonality, ii) sound level tolerance (using Loudness Discomfort Level of <60  
4 dB SL as an indicator for hyperacusis), iii) 'Normo-acoustic' (defined as pure-tone thresholds  
5 of 20dB HL or less in all audiometric test frequencies between 0.25 and 8 kHz in both ears),  
6  
7 and iv) presence of a noise-induced audiometric profile (defined as a dip in pure-tone  
8 hearing thresholds of 10dB or more in any frequency in the 3 to 6 kHz range in any ear).

9  
10 These co-variables are not mutually exclusive, so priority during stratified randomisation will  
11 be given to the least prevalent co-variables based on candidate characteristics from the  
12 screening phase of the study.

13  
14 The stratification and randomisation will be performed adaptively (Minimisation) 28),  
15 whereby the probability of assignment to a treatment intervention changes as the imbalance  
16 within the relevant stratum increases. Dice rolls emulated in Matlab's Mersenne Twister  
17 algorithm (version 2016a) will be used with the randomisation seed set to the date each new  
18 block of patients is randomised.  
19  
20  
21  
22  
23  
24  
25  
26  
27  
28  
29  
30  
31  
32

### 33 Data Management

34 All data will be collected electronically using a validated electronic Case Report Form  
35 (eCRF) application. Patient data collected at all stages of the trial will be entered into the  
36 eCRF using UIC's assigned to patients at recruitment phase. All investigators and patients  
37 will be blinded to allocation arm and no allocation information will be contained in the eCRF.  
38  
39 The data monitors will be able to remotely view the data in the eCRF to monitor safety data.  
40  
41  
42  
43  
44  
45  
46  
47

### 48 Statistical Methods

49 The main indicators of clinical efficacy for the three different parameter sets are two patient-  
50 reported outcomes (THI and TFI) after 12 weeks of intervention. Baseline outcome  
51 measures are computed as the average scores at the Screening and Enrolment visits.  
52  
53 Clinical efficacy will be explored for a series of patient subtypes, split by the stratification  
54 variables, while evidence for sustained effects on the psychological and functional impact of  
55  
56  
57  
58  
59  
60

1  
2  
3 tinnitus will be followed up for 12 months. Additional feasibility measures to inform future trial  
4 design include: reasons for exclusion, completeness of data collection, attrition rates,  
5 patients' adherence to the device usage as per manufacturer's instructions. These will be  
6 collated using descriptive statistics and reported as percentages. We will also evaluate the  
7 alternative methods for estimating tinnitus impact and tinnitus loudness, as far as possible  
8 using psychometric criteria defined by the COSMIN checklist (29).

9  
10  
11 Efficacy analyses will focus on investigating i) between-arm changes in the THI and TFI  
12 outcome measures from Baseline to End-point, and ii) within-arm changes in THI and TFI  
13 outcome measures from Baseline to End-point, for the full cohort and then sequentially  
14 testing the subtypes described above using serial gatekeeping to control the family-wise  
15 error rate at the 0.05 significance level. The between-arm analyses will be based on an  
16 intention-to-treat estimand and tested with multiple regression utilising Baseline scores as a  
17 covariate. Missing data will be handled by using Markov chain Monte Carlo multiple  
18 imputation methods (Rubin, 2004; Schafer, 1997). The within-arm analyses will be based on  
19 a per-protocol estimand and tested with paired two-tailed t-tests. The use of per-protocol  
20 estimand will ensure that the changes in outcome measures within a particular treatment  
21 arm are reflective of real-use scenarios, i.e. where the patients use the treatment as  
22 directed. The threshold for inclusion in the per-protocol analysis is set at the pre-defined  
23 minimum acceptable compliance threshold previously described. Additional exploratory  
24 efficacy analyses shall be conducted in order to ascertain treatment effects from Baseline to  
25 Interim (i.e. 6 weeks of treatment), and to evaluate any sustained efficacy by analysing  
26 changes in efficacy outcome measures from End-point to the three Follow-up assessments  
27 (i.e. at 18, 36 and 60 weeks after device fitting).

28  
29  
30 Safety analyses will be performed by evaluating the incidence of adverse events, classified  
31 as treatment or non-treatment related, and further sub-classified as Minor, Major and  
32 Serious. Adverse events will be recorded proactively, by monitoring significant changes in  
33 THI, TFI, MML, hearing thresholds and oral health, and reactively by documenting any  
34  
35  
36  
37  
38  
39  
40  
41  
42  
43  
44  
45  
46  
47  
48  
49  
50  
51  
52  
53  
54  
55  
56  
57  
58  
59  
60



1  
2  
3 adverse events reported by patients during the study. All adverse events will be analysed for  
4 trends, and statistical tests for significant between-arm differences will be conducted.

5  
6  
7 Efficacy and safety data analysis will be conducted in compliance with the Consolidated  
8  
9 Standards of Reporting Trials (CONSORT) guidelines for randomised controlled trials (30)  
10  
11 using the SAS software package.

### 12 13 **Dissemination**

14  
15 Findings will be disseminated to relevant research, clinical, health service and patient  
16  
17 communities through publications in peer-reviewed and popular science journals and  
18  
19 presentations at scientific and clinical conferences.  
20

## 21 22 23 24 **DISCUSSION**

25  
26 This paper outlines the protocol for a multi-site, randomised, triple-blind, exploratory study  
27  
28 designed to explore the effects of different bi-modal stimulation parameter sets across a  
29  
30 number of tinnitus subtypes in a range of tinnitus clinical subdomains. The results of this  
31  
32 study will inform the design of future triple-blind randomised control trials. The main objective  
33  
34 is to determine an optimised bi-modal stimulation parameter set, but we will also explore  
35  
36 which patient characteristics might best predict therapeutic benefit in that treatment arm. We  
37  
38 anticipate that this could lead to improved personalised intervention options for people with  
39  
40 chronic subjective tinnitus.  
41

42  
43  
44 This study is timely for several reasons. First, completing this exploratory trial will be  
45  
46 important in determining any feasibility challenges and will be used to estimate the time,  
47  
48 resources and sample size required for a full-scale RCT to answer the definitive question of  
49  
50 clinical efficacy. Second, findings from this study could potentially inform the acceptability of  
51  
52 bimodal stimulation in the wider population. There is a real need for effective therapeutic  
53  
54 options that reduce or alleviate the tinnitus percept instead of simply helping people to  
55  
56 manage the cognitive, emotional and behaviour impacts of their symptoms or to accept their  
57  
58  
59  
60

1  
2  
3 long-term condition (3). Third, low quality clinical trial design and reporting has been  
4 identified as a major barrier to developing effective tinnitus therapies and standards of  
5 practice have been proposed 31,32, 33). The study design and protocol description is in line  
6 with those recommendations.  
7  
8  
9

#### 10 **AUTHORS' CONTRIBUTIONS:**

11  
12 SD, CH, SH and BC conceived of the study. SD, CH, SH initiated the study design. SH  
13 provided statistical expertise in clinical trial design. BL, SV and DAH are members of the  
14 Science Advisory Board for Neuromod Devices Ltd and contributed to the Clinical  
15 Investigation Plan and the Statistical Analysis Plan, on which the protocol is based. BL and  
16 BC are Principal Investigators at the two trial sites. All authors contributed to the refinement  
17 of the study protocol and approved the final manuscript. SD submitted the manuscript for  
18 publication.  
19  
20  
21  
22  
23  
24  
25  
26  
27

#### 28 **FUNDING STATEMENT:**

29 This work was supported by Neuromod Devices Ltd.  
30  
31  
32

#### 33 **COMPETING INTERESTS STATEMENT**

34  
35 SD, CH, SH, and BC are employees and shareholders of the Sponsor. BL, SV and DAH act  
36 as paid consultants for the Sponsor.  
37  
38  
39  
40

#### 41 **DATA SHARING STATEMENT**

42 The data from this study will not be shared publicly shared.  
43  
44  
45  
46  
47  
48  
49  
50  
51  
52  
53  
54  
55  
56  
57  
58  
59  
60

## References

1. Lockwood AH, Salvi RJ, Burkard RF. Tinnitus. *N. Engl. J. Med.* 2002;347(12): 904–910.
2. Eggermont JJ, Roberts LE. The neuroscience of tinnitus. *Trends Neurosci.* 2004;27(11): 676–682.
3. Hoare DJ, Kowalkowski VL, Kang S, Hall DA. Systematic review and meta-analyses of randomized controlled trials examining tinnitus management. *The Laryngoscope* 2011;121(7):1555–1564.
4. Hoare DJ, Edmondson-Jones M, Sereda M, Akeroyd MA, Hall D. Amplification with hearing aids for patients with tinnitus and co-existing hearing loss. *Cochrane Database of Systematic Reviews* 2014;1: Art. No.: CD010151. doi: 10.1002/14651858.CD010151.pub2
5. Langguth B, De Ridder D. Tinnitus: therapeutic use of superficial brain stimulation. *Handb. Clin. Neurol.* 2013;116:441–467. doi: 10.1016/B978-0-444-53497-2.00036-X.
6. Vanneste S, De Ridder D. Noninvasive and invasive neuromodulation for the treatment of tinnitus: an overview. *Neuromodulation Technol. Neural Interface* 2012;15(4):350–360. doi: 10.1111/j.1525-1403.2012.00447.x.
7. Krames ES, Peckham PH, Rezai AR, Aboelsaad F. What is Neuromodulation? In: Krames ES, Peckham PH, Rezai AR, editors. *Neuromodulation*. San Diego: Academic Press; 2009. pp. 3–8.
8. De Ridder D, Vanneste S, Engineer ND, Kilgard MP. Safety and efficacy of vagus nerve stimulation paired with tones for the treatment of tinnitus: a case series. *Neuromodulation Technol. Neural Interface* 2014;17(2):170–179. doi: 10.1111/ner.12127.

- 1  
2  
3 9. Kreuzer PM, Landgrebe M, Resch M, Husser O, Schecklmann M, Geisreiter F,  
4 Poeppl TB, Prasser SJ, Hajak G, Rupprecht R, others. Feasibility, safety and efficacy  
5 of transcutaneous vagus nerve stimulation in chronic tinnitus: an open pilot study.  
6  
7 *Brain Stimulat.* 2014;7(5):740–747. doi: 10.1016/j.brs.2014.05.003.  
8  
9  
10  
11  
12 10. Lehtimäki J, Hyvärinen P, Ylikoski M, Bergholm M, Mäkelä JP, Aarnisalo A, Pirvola  
13 U, Mäkitie A, Ylikoski J. Transcutaneous vagus nerve stimulation in tinnitus: a pilot  
14 study. *Acta Otolaryngol. (Stockh.)* 2013;133(4):378–382. doi:  
15 10.3109/00016489.2012.750736.  
16  
17  
18  
19 11. Hamilton C, D’Arcy S, Pearlmutter BA, Crispino G, Lalor EC, Conlon BJ. An  
20 Investigation of Feasibility and Safety of Bi-Modal Stimulation for the Treatment of  
21 Tinnitus: An Open-Label Pilot Study: *Neuromodulation Technol. Neural Interface.*  
22 2016;19(8):832-837. doi:10.1111/ner.12452  
23  
24  
25  
26  
27  
28  
29 12. Shore S, Marks K, Martel D.T, Basura G.J, Roberts L.E, Leyzac K Auditory-  
30 Somatosensory Stimulation Alleviates Tinnitus in Human Subjects. Proc. ARO 40<sup>th</sup>  
31 Annual Mid-winter meeting, Baltimore 2017  
32  
33  
34  
35  
36 13. Engineer ND, Riley JR, Seale JD, Vrana WA, Shetake JA, Sudanagunta SP, Borland  
37 MS, Kilgard MP. Reversing pathological neural activity using targeted plasticity.  
38 *Nature* 2011;470(7332):101–104. doi: 10.1038/nature09656.  
39  
40  
41  
42  
43 14. Kreuzer PM, Landgrebe M, Husser O, Resch M, Schecklmann M, Geisreiter F,  
44 Poeppl TB, Prasser SJ, Hajak G, Langguth B. Transcutaneous Vagus Nerve  
45 Stimulation: Retrospective Assessment of Cardiac Safety in a Pilot Study. *Front.*  
46 *Psychiatry* 2012;3:70. doi:10.3389/fpsy.2012.00070  
47  
48  
49  
50  
51  
52 15. Koehler SD, Shore SE. Stimulus Timing-Dependent Plasticity in Dorsal Cochlear  
53 Nucleus Is Altered in Tinnitus. *J. Neurosci.* 2013;33(50):19647–19656.  
54 doi:10.1523/JNEUROSCI.2788-13.2013  
55  
56  
57  
58  
59  
60

- 1  
2  
3 16. Chan A-W, Tetzlaff JM, Gøtzsche PC, Altman DG, Mann H, Berlin J, Dickersin K,  
4 Hróbjartsson A, Schulz KF, Parulekar WR, Krleža-Jerić K, Laupacis A, Moher D.  
5 SPIRIT 2013 Explanation and Elaboration: Guidance for protocols of clinical trials.  
6  
7  
8  
9  
10  
11  
12 17. Spielberger CD, Gorsuch RL, Lushene R, Vagg PR, Jacobs GA. Manual for the  
13  
14 State-Trait Anxiety Inventory. Palo Alto, CA: Consulting Psychologists Press. 1983.  
15  
16  
17 18. Kvaal K, Ulstein I, Nordhus IH, Engedal K. The Spielberger State-Trait Anxiety  
18  
19 Inventory (STAI): the state scale in detecting mental disorders in geriatric patients. *Int*  
20  
21 *J Geriatr Psychiatry* 2005;20(7):629-34.  
22  
23 19. Folstein MF, Folstein SE, McHugh PR. "Mini-mental state". A practical method for  
24  
25 grading the cognitive state of patients for the clinician. *J Psychiatr Res*.  
26  
27 1975;12(3):189-98. doi:10.1016/0022-3956(75)90026-6  
28  
29  
30 20. Newman CW, Jacobson GP, Spitzer JB. Development of the Tinnitus Handicap  
31  
32 Inventory. *Arch. Otolaryngol. - Head Neck Surg.* 1996;122(2):143-148.  
33  
34 doi:10.1001/archotol.1996.01890140029007  
35  
36  
37 21. Meikle MB, Henry JA, Griest SE, Stewart BJ, Abrams HB, McArdle R, Myers PJ,  
38  
39 Newman CW, Sandridge S, Turk DC, Folmer RL, Frederick EJ, House JW, Jacobson  
40  
41 GP, Kinney SE, Martin WH, Nagler SM, Reich GE, Searchfield G, Sweetow R,  
42  
43 Vernon JA. The Tinnitus Functional Index: Development of a New Clinical Measure  
44  
45 for Chronic, Intrusive Tinnitus. *Ear and Hearing.* 2012;33(2):153-176.  
46  
47 doi:10.1097/AUD.0b013e31822f67c0  
48  
49  
50 22. Fackrell, K, Hall DA, Barry JG, Hoare DJ. Psychometric properties of the Tinnitus  
51  
52 Functional Index (TFI): assessment in a UK research volunteer population. *Hearing*  
53  
54 *Research.* 2016;335:220-235. doi: 10.1016/j.heares.2015.09.009.  
55  
56  
57  
58  
59  
60

- 1  
2  
3 23. Henry JA, Meikle MB. Psychoacoustic Measures of Tinnitus. *J Am Acad Audiol*  
4  
5 2000;11:138–155.  
6  
7  
8 24. Henry JA, James KE, Owens K, Zaugg T, Porsov E, Silaski G. Auditory test result  
9  
10 characteristics of subjects with and without tinnitus. *The Journal of Rehabilitation*  
11  
12 *Research and Development* 2009;46(5):619.  
13  
14 25. Adamchic I, Langguth B, Hauptmann C, Alexander Tass, P. Psychometric Evaluation  
15  
16 of Visual Analog Scale for the Assessment of Chronic Tinnitus. *Am. J. Audiol.*  
17  
18 2012;21(2): 215. doi:10.1044/1059-0889(2012/12-0010)  
19  
20  
21 26. Levine RA. Somatic (craniocervical) tinnitus and the dorsal cochlear nucleus  
22  
23 hypothesis. *Am. J. Otolaryngol.* 1999;20(6):351–362. doi:10.1016/S0196-  
24  
25 0709(99)90074-1  
26  
27  
28 27. Zeman F, Koller M, Figueiredo R, Aazevedo A, Rates M, Coelho C, Kleinjung T, de  
29  
30 Ridder D, Langguth B, Landgrebe M. Tinnitus Handicap Inventory for Evaluating  
31  
32 Treatment Effects Which Changes Are Clinically Relevant? *Otolaryngol. Neck Surg.*  
33  
34 2011;145(2):282–287. doi: 10.1177/0194599811403882.  
35  
36  
37 28. Pocock SJ, Simon R. Sequential treatment assignment with balancing for prognostic  
38  
39 factors in the controlled clinical trial. *Biometrics* 1975;31(1):103–115.  
40  
41  
42 29. Mokkink LB, Terwee CB, Patrick DL, Alonso J, Stratford PW, Knol DL, Bouter LW de  
43  
44 Vet HCW. The COSMIN checklist for assessing the methodological quality of studies  
45  
46 on measurement properties of health status measurement instruments: an  
47  
48 international Delphi study. *Qual Life Res* 2010;19(4):539-49. doi: 10.1007/s11136-010-9606-  
49  
50 8.  
51  
52  
53 30. Schulz KF, Altman DG, Moher D. CONSORT 2010 statement: updated guidelines for  
54  
55 reporting parallel group randomized trials. *PLoS Med.* 2010;7(3):e1000251. doi:  
56  
57 10.1371/journal.pmed.1000251  
58  
59  
60

- 1  
2  
3 31. Hall DA, Haider H, Kikidis D, Mielczarek M, Mazurek B, Szczepek AJ, Cederroth CR.  
4  
5 Toward a Global Consensus on Outcome Measures for Clinical Trials in Tinnitus:  
6  
7 Report From the First International Meeting of the COMiT Initiative, November 14,  
8  
9 2014, Amsterdam, The Netherlands. *Trends Hear.* 2015;19:2331216515580271.  
10  
11 doi:10.1177/2331216515580272  
12  
13  
14 32. Hall DA, Haider H, Szczepek AJ, Lau P, Rabau S, Jones-Diette J, Londero A, Edvall  
15  
16 NK, Cederroth CR, Mielczarek M, Fuller T, Batuecas-Caletrio A, Brueggemen  
17  
18 P, Thompson DM, Norena A, Cima RF, Mehta RL, Mazurek B. Systematic review of  
19  
20 outcome domains and instruments used in clinical trials of tinnitus treatments in  
21  
22 adults. *Trials* 2016;17(1):270. doi: 10.1186/s13063-016-1399-9.  
23  
24  
25 33. Landgrebe M, Azevedo A, Baguley D, Bauer C, Cacace A, Coelho C, Dornhoffer J,  
26  
27 Figueiredo R, Flor H, Hajak G, van de Heyning P, Hiller W, Khedr E, Kleinjung T,  
28  
29 Koller M, Lainez JM, Londero A, Martin WH, Mennemeier M, Piccirillo J, De Ridder  
30  
31 D, Rupprecht R, Searchfield G, Vanneste S, Zeman F, Langguth B. Methodological  
32  
33 aspects of clinical trials in tinnitus: A proposal for an international standard. *J.*  
34  
35 *Psychosom. Res.* 2012;73(2):112–121. doi:10.1016/j.jpsychores.2012.05.002  
36  
37  
38  
39  
40  
41  
42  
43  
44  
45  
46  
47  
48  
49  
50  
51  
52  
53  
54  
55  
56  
57  
58  
59  
60

For peer review only

1  
2  
3  
4  
5  
6  
7  
8  
9  
10  
11  
12  
13  
14  
15  
16  
17  
18  
19  
20  
21  
22  
23  
24  
25  
26  
27  
28  
29  
30  
31  
32  
33  
34  
35  
36  
37  
38  
39  
40  
41  
42  
43  
44  
45  
46  
47  
48  
49



|       | Auditory stimulation                                                                                                                           | Temporal relationship with somatosensory stimulation                  |
|-------|------------------------------------------------------------------------------------------------------------------------------------------------|-----------------------------------------------------------------------|
| Arm 1 | Sequence of tones, mixed with a broadband noise that is spectrally modified to compensate for any hearing loss                                 | Somatosensory pulses are synchronous with the tones                   |
| Arm 2 | Sequence of tones, mixed with a broadband noise that is spectrally modified to compensate for any hearing loss                                 | Somatosensory pulses are asynchronous with the tones                  |
| Arm 3 | Sequence of tones mixed with a broadband noise with the spectral range outside the regions normally associated with sensorineural hearing loss | Somatosensory pulses are uncorrelated and asynchronous with the tones |

Table 1 Stimulation parameter set for the three parallel arms

|                                                         | Screening        | Enrolment and fitting | Post-allocation  |                  |                  |                   | Follow-up         | Follow-up         | Follow-up         |
|---------------------------------------------------------|------------------|-----------------------|------------------|------------------|------------------|-------------------|-------------------|-------------------|-------------------|
|                                                         | Screening        | Enrolment             | Telephone call   | Interim visit    | Telephone call   | Endpoint visit    |                   |                   |                   |
| TIMEPOINT**                                             | wk-6 to 10       | wk1 <sup>1</sup>      | wk3 <sup>1</sup> | wk6 <sup>1</sup> | wk9 <sup>1</sup> | wk12 <sup>1</sup> | wk18 <sup>1</sup> | wk36 <sup>1</sup> | wk60 <sup>1</sup> |
| <b>ENROLMENT:</b>                                       |                  |                       |                  |                  |                  |                   |                   |                   |                   |
| Eligibility screen                                      | X                |                       |                  |                  |                  |                   |                   |                   |                   |
| Informed consent                                        | X                |                       |                  |                  |                  |                   |                   |                   |                   |
| Allocation                                              |                  | X                     |                  |                  |                  |                   |                   |                   |                   |
| Training on how to use the device                       |                  | X                     |                  |                  |                  |                   |                   |                   |                   |
| Review of device usage data log with participant        |                  |                       |                  | X                |                  |                   |                   |                   |                   |
| Encourage compliance                                    |                  | X                     | X                | X                | X                |                   |                   |                   |                   |
| Return device                                           |                  |                       |                  |                  |                  | X                 |                   |                   |                   |
| <b>INTERVENTIONS:</b>                                   |                  |                       |                  |                  |                  |                   |                   |                   |                   |
| Arm 1                                                   |                  |                       | ◆—————◆          |                  |                  |                   |                   |                   |                   |
| Arm 2                                                   |                  |                       | ◆—————◆          |                  |                  |                   |                   |                   |                   |
| Arm 3                                                   |                  |                       | ◆—————◆          |                  |                  |                   |                   |                   |                   |
| <b>ASSESSMENTS:</b>                                     |                  |                       |                  |                  |                  |                   |                   |                   |                   |
| Medical history                                         | X                |                       |                  |                  |                  |                   |                   |                   |                   |
| Previous or concomitant medications/illnesses           |                  | X <sup>2</sup>        |                  | X                |                  | X                 | X                 | X                 | X                 |
| Tinnitus location & tonality                            | X <sup>3</sup>   | X <sup>2</sup>        |                  | X                |                  | X                 | X                 | X                 | X                 |
| Audiometric tests of hearing                            | X <sup>3,4</sup> |                       |                  |                  |                  |                   |                   |                   |                   |
| Loudness Discomfort Level                               | X <sup>3</sup>   |                       |                  |                  |                  | X                 |                   |                   |                   |
| Mini-Mental Stat Examination                            | X                |                       |                  |                  |                  |                   |                   |                   |                   |
| Somatic assessment                                      |                  | X                     |                  |                  |                  |                   |                   |                   |                   |
| Oral assessment                                         |                  | X                     |                  |                  |                  | X                 |                   |                   |                   |
| Regensburg Insomnia Scale                               |                  | X                     |                  |                  |                  | X                 |                   |                   |                   |
| State-Trait Anxiety Inventory                           | X                |                       |                  | X                |                  | X                 |                   |                   |                   |
| Tinnitus Functional Index                               | X                | X                     |                  | X                |                  | X                 | X                 | X                 | X                 |
| Minimum Masking Level                                   | X                | X                     |                  | X                |                  | X                 | X                 | X                 | X                 |
| Tinnitus Loudness Matching                              | X                | X                     |                  | X                |                  | X                 | X                 | X                 | X                 |
| Tinnitus Handicap Inventory                             | X                | X                     |                  | X                |                  | X                 | X                 | X                 | X                 |
| Visual Analogue Scales (loudness and intrusiveness)     | X                |                       |                  |                  |                  | X                 | X                 | X                 | X                 |
| Adverse events                                          |                  | X <sup>2</sup>        |                  | X                |                  | X                 | X                 | X                 | X                 |
| Clinical Global Impression (loudness and intrusiveness) |                  |                       |                  | X                |                  | X                 |                   |                   |                   |
| Device usability questionnaire                          |                  |                       |                  |                  |                  | X                 |                   |                   |                   |
| Hyperacusis questionnaire <sup>5</sup>                  |                  |                       |                  |                  |                  |                   |                   | X                 |                   |

Table 2. Schedule of Assessment

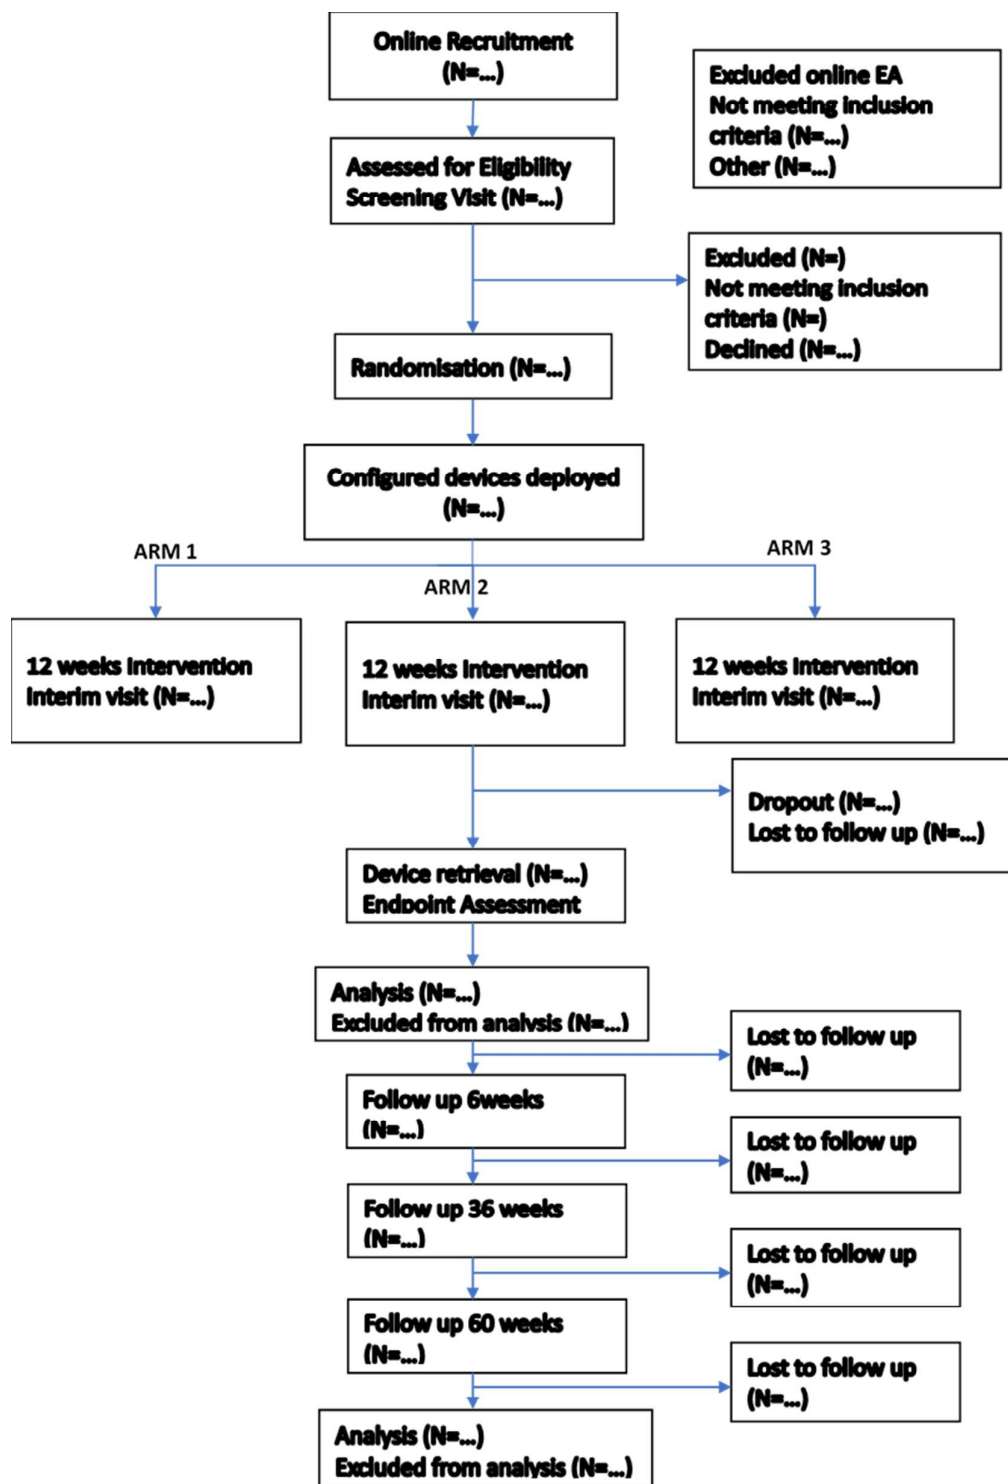

Figure 1 Anticipated flow of participants through the TENT study

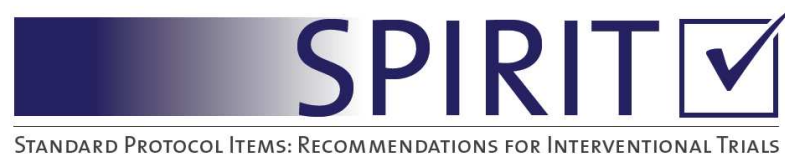

SPIRIT 2013 Checklist: Recommended items to address in a clinical trial protocol and related documents\*

**\*while these items are not described in the manuscript they are addressed in our protocol, the study has been designed in line with GCP, SPIRIT and ISO14155 guidelines.**

| Section/item                      | Item No | Description                                                                                                                                                                                                                                                                              | Addressed on page number    |
|-----------------------------------|---------|------------------------------------------------------------------------------------------------------------------------------------------------------------------------------------------------------------------------------------------------------------------------------------------|-----------------------------|
| <b>Administrative information</b> |         |                                                                                                                                                                                                                                                                                          |                             |
| Title                             | 1       | Descriptive title identifying the study design, population, interventions, and, if applicable, trial acronym                                                                                                                                                                             | 1                           |
| Trial registration                | 2a      | Trial identifier and registry name. If not yet registered, name of intended registry                                                                                                                                                                                                     | 3                           |
|                                   | 2b      | All items from the World Health Organization Trial Registration Data Set                                                                                                                                                                                                                 | N/A                         |
| Protocol version                  | 3       | Date and version identifier                                                                                                                                                                                                                                                              | Not reported in manuscript* |
| Funding                           | 4       | Sources and types of financial, material, and other support                                                                                                                                                                                                                              | 3                           |
| Roles and responsibilities        | 5a      | Names, affiliations, and roles of protocol contributors                                                                                                                                                                                                                                  | 1                           |
|                                   | 5b      | Name and contact information for the trial sponsor                                                                                                                                                                                                                                       | 3                           |
|                                   | 5c      | Role of study sponsor and funders, if any, in study design; collection, management, analysis, and interpretation of data; writing of the report; and the decision to submit the report for publication, including whether they will have ultimate authority over any of these activities | 16                          |

|    |                                                           |     |                                                                                                                                                                                                                                                                  |
|----|-----------------------------------------------------------|-----|------------------------------------------------------------------------------------------------------------------------------------------------------------------------------------------------------------------------------------------------------------------|
| 1  |                                                           |     |                                                                                                                                                                                                                                                                  |
| 2  |                                                           |     |                                                                                                                                                                                                                                                                  |
| 3  |                                                           | 5d  | Composition, roles, and responsibilities of the coordinating centre, steering committee, endpoint adjudication committee, data management team, and other individuals or groups overseeing the trial, if applicable (see Item 21a for data monitoring committee) |
| 4  |                                                           |     | Not reported in manuscript                                                                                                                                                                                                                                       |
| 5  |                                                           |     |                                                                                                                                                                                                                                                                  |
| 6  |                                                           |     |                                                                                                                                                                                                                                                                  |
| 7  |                                                           |     |                                                                                                                                                                                                                                                                  |
| 8  |                                                           |     |                                                                                                                                                                                                                                                                  |
| 9  |                                                           |     |                                                                                                                                                                                                                                                                  |
| 10 |                                                           |     |                                                                                                                                                                                                                                                                  |
| 11 | <b>Introduction</b>                                       |     |                                                                                                                                                                                                                                                                  |
| 12 |                                                           |     |                                                                                                                                                                                                                                                                  |
| 13 | Background and rationale                                  | 6a  | Description of research question and justification for undertaking the trial, including summary of relevant studies (published and unpublished) examining benefits and harms for each intervention                                                               |
| 14 |                                                           |     | 4-5                                                                                                                                                                                                                                                              |
| 15 |                                                           | 6b  | Explanation for choice of comparators                                                                                                                                                                                                                            |
| 16 |                                                           |     | 5                                                                                                                                                                                                                                                                |
| 17 | Objectives                                                | 7   | Specific objectives or hypotheses                                                                                                                                                                                                                                |
| 18 |                                                           |     | 5                                                                                                                                                                                                                                                                |
| 19 | Trial design                                              | 8   | Description of trial design including type of trial (eg, parallel group, crossover, factorial, single group), allocation ratio, and framework (eg, superiority, equivalence, noninferiority, exploratory)                                                        |
| 20 |                                                           |     | 5-6                                                                                                                                                                                                                                                              |
| 21 |                                                           |     |                                                                                                                                                                                                                                                                  |
| 22 |                                                           |     |                                                                                                                                                                                                                                                                  |
| 23 |                                                           |     |                                                                                                                                                                                                                                                                  |
| 24 | <b>Methods: Participants, interventions, and outcomes</b> |     |                                                                                                                                                                                                                                                                  |
| 25 |                                                           |     |                                                                                                                                                                                                                                                                  |
| 26 | Study setting                                             | 9   | Description of study settings (eg, community clinic, academic hospital) and list of countries where data will be collected. Reference to where list of study sites can be obtained                                                                               |
| 27 |                                                           |     | 6                                                                                                                                                                                                                                                                |
| 28 | Eligibility criteria                                      | 10  | Inclusion and exclusion criteria for participants. If applicable, eligibility criteria for study centres and individuals who will perform the interventions (eg, surgeons, psychotherapists)                                                                     |
| 29 |                                                           |     | 6                                                                                                                                                                                                                                                                |
| 30 | Interventions                                             | 11a | Interventions for each group with sufficient detail to allow replication, including how and when they will be administered                                                                                                                                       |
| 31 |                                                           |     | Table 1                                                                                                                                                                                                                                                          |
| 32 |                                                           | 11b | Criteria for discontinuing or modifying allocated interventions for a given trial participant (eg, drug dose change in response to harms, participant request, or improving/worsening disease)                                                                   |
| 33 |                                                           |     | 9                                                                                                                                                                                                                                                                |
| 34 |                                                           | 11c | Strategies to improve adherence to intervention protocols, and any procedures for monitoring adherence (eg, drug tablet return, laboratory tests)                                                                                                                |
| 35 |                                                           |     | 11                                                                                                                                                                                                                                                               |
| 36 |                                                           | 11d | Relevant concomitant care and interventions that are permitted or prohibited during the trial                                                                                                                                                                    |
| 37 |                                                           |     | N/A                                                                                                                                                                                                                                                              |
| 38 |                                                           |     |                                                                                                                                                                                                                                                                  |
| 39 |                                                           |     |                                                                                                                                                                                                                                                                  |
| 40 |                                                           |     |                                                                                                                                                                                                                                                                  |
| 41 |                                                           |     |                                                                                                                                                                                                                                                                  |
| 42 |                                                           |     |                                                                                                                                                                                                                                                                  |
| 43 |                                                           |     |                                                                                                                                                                                                                                                                  |
| 44 |                                                           |     |                                                                                                                                                                                                                                                                  |
| 45 |                                                           |     |                                                                                                                                                                                                                                                                  |
| 46 |                                                           |     |                                                                                                                                                                                                                                                                  |
| 47 |                                                           |     |                                                                                                                                                                                                                                                                  |
| 48 |                                                           |     |                                                                                                                                                                                                                                                                  |
| 49 |                                                           |     |                                                                                                                                                                                                                                                                  |

|    |                      |    |                                                                                                                                                                                                                                                                                                                                                                                |                |
|----|----------------------|----|--------------------------------------------------------------------------------------------------------------------------------------------------------------------------------------------------------------------------------------------------------------------------------------------------------------------------------------------------------------------------------|----------------|
| 1  |                      |    |                                                                                                                                                                                                                                                                                                                                                                                |                |
| 2  |                      |    |                                                                                                                                                                                                                                                                                                                                                                                |                |
| 3  | Outcomes             | 12 | Primary, secondary, and other outcomes, including the specific measurement variable (eg, systolic blood pressure), analysis metric (eg, change from baseline, final value, time to event), method of aggregation (eg, median, proportion), and time point for each outcome. Explanation of the clinical relevance of chosen efficacy and harm outcomes is strongly recommended | 8              |
| 4  |                      |    |                                                                                                                                                                                                                                                                                                                                                                                |                |
| 5  |                      |    |                                                                                                                                                                                                                                                                                                                                                                                |                |
| 6  |                      |    |                                                                                                                                                                                                                                                                                                                                                                                |                |
| 7  |                      |    |                                                                                                                                                                                                                                                                                                                                                                                |                |
| 8  | Participant timeline | 13 | Time schedule of enrolment, interventions (including any run-ins and washouts), assessments, and visits for participants. A schematic diagram is highly recommended (see Figure)                                                                                                                                                                                               | 11-12, Table 2 |
| 9  |                      |    |                                                                                                                                                                                                                                                                                                                                                                                |                |
| 10 |                      |    |                                                                                                                                                                                                                                                                                                                                                                                |                |
| 11 | Sample size          | 14 | Estimated number of participants needed to achieve study objectives and how it was determined, including clinical and statistical assumptions supporting any sample size calculations                                                                                                                                                                                          | 12             |
| 12 |                      |    |                                                                                                                                                                                                                                                                                                                                                                                |                |
| 13 |                      |    |                                                                                                                                                                                                                                                                                                                                                                                |                |
| 14 | Recruitment          | 15 | Strategies for achieving adequate participant enrolment to reach target sample size                                                                                                                                                                                                                                                                                            | 10             |
| 15 |                      |    |                                                                                                                                                                                                                                                                                                                                                                                |                |
| 16 |                      |    |                                                                                                                                                                                                                                                                                                                                                                                |                |

### 17 **Methods: Assignment of interventions (for controlled trials)**

#### 18 Allocation:

|    |                                  |     |                                                                                                                                                                                                                                                                                                                                                          |                            |
|----|----------------------------------|-----|----------------------------------------------------------------------------------------------------------------------------------------------------------------------------------------------------------------------------------------------------------------------------------------------------------------------------------------------------------|----------------------------|
| 19 |                                  |     |                                                                                                                                                                                                                                                                                                                                                          |                            |
| 20 |                                  |     |                                                                                                                                                                                                                                                                                                                                                          |                            |
| 21 | Sequence generation              | 16a | Method of generating the allocation sequence (eg, computer-generated random numbers), and list of any factors for stratification. To reduce predictability of a random sequence, details of any planned restriction (eg, blocking) should be provided in a separate document that is unavailable to those who enrol participants or assign interventions | 12                         |
| 22 |                                  |     |                                                                                                                                                                                                                                                                                                                                                          |                            |
| 23 |                                  |     |                                                                                                                                                                                                                                                                                                                                                          |                            |
| 24 |                                  |     |                                                                                                                                                                                                                                                                                                                                                          |                            |
| 25 |                                  |     |                                                                                                                                                                                                                                                                                                                                                          |                            |
| 26 | Allocation concealment mechanism | 16b | Mechanism of implementing the allocation sequence (eg, central telephone; sequentially numbered, opaque, sealed envelopes), describing any steps to conceal the sequence until interventions are assigned                                                                                                                                                | 12, 13                     |
| 27 |                                  |     |                                                                                                                                                                                                                                                                                                                                                          |                            |
| 28 |                                  |     |                                                                                                                                                                                                                                                                                                                                                          |                            |
| 29 |                                  |     |                                                                                                                                                                                                                                                                                                                                                          |                            |
| 30 | Implementation                   | 16c | Who will generate the allocation sequence, who will enrol participants, and who will assign participants to interventions                                                                                                                                                                                                                                | 12                         |
| 31 |                                  |     |                                                                                                                                                                                                                                                                                                                                                          |                            |
| 32 |                                  |     |                                                                                                                                                                                                                                                                                                                                                          |                            |
| 33 |                                  |     |                                                                                                                                                                                                                                                                                                                                                          |                            |
| 34 | Blinding (masking)               | 17a | Who will be blinded after assignment to interventions (eg, trial participants, care providers, outcome assessors, data analysts), and how                                                                                                                                                                                                                | 13                         |
| 35 |                                  |     |                                                                                                                                                                                                                                                                                                                                                          |                            |
| 36 |                                  |     |                                                                                                                                                                                                                                                                                                                                                          |                            |
| 37 |                                  | 17b | If blinded, circumstances under which unblinding is permissible, and procedure for revealing a participant's allocated intervention during the trial                                                                                                                                                                                                     | Not reported in manuscript |
| 38 |                                  |     |                                                                                                                                                                                                                                                                                                                                                          |                            |
| 39 |                                  |     |                                                                                                                                                                                                                                                                                                                                                          |                            |

### 40 **Methods: Data collection, management, and analysis**

|    |                                 |     |                                                                                                               |                 |
|----|---------------------------------|-----|---------------------------------------------------------------------------------------------------------------|-----------------|
| 1  |                                 |     |                                                                                                               |                 |
| 2  |                                 |     |                                                                                                               |                 |
| 3  | Data collection                 | 18a | Plans for assessment and collection of outcome, baseline, and other trial data, including any related         | 13              |
| 4  | methods                         |     | processes to promote data quality (eg, duplicate measurements, training of assessors) and a description of    |                 |
| 5  |                                 |     | study instruments (eg, questionnaires, laboratory tests) along with their reliability and validity, if known. |                 |
| 6  |                                 |     | Reference to where data collection forms can be found, if not in the protocol                                 |                 |
| 7  |                                 |     |                                                                                                               |                 |
| 8  |                                 | 18b | Plans to promote participant retention and complete follow-up, including list of any outcome data to be       | Not reported in |
| 9  |                                 |     | collected for participants who discontinue or deviate from intervention protocols                             | manuscript      |
| 10 |                                 |     |                                                                                                               |                 |
| 11 | Data management                 | 19  | Plans for data entry, coding, security, and storage, including any related processes to promote data quality  | 13              |
| 12 |                                 |     | (eg, double data entry; range checks for data values). Reference to where details of data management          |                 |
| 13 |                                 |     | procedures can be found, if not in the protocol                                                               |                 |
| 14 |                                 |     |                                                                                                               |                 |
| 15 | Statistical methods             | 20a | Statistical methods for analysing primary and secondary outcomes. Reference to where other details of the     | 13-14           |
| 16 |                                 |     | statistical analysis plan can be found, if not in the protocol                                                |                 |
| 17 |                                 |     |                                                                                                               |                 |
| 18 |                                 | 20b | Methods for any additional analyses (eg, subgroup and adjusted analyses)                                      | 14              |
| 19 |                                 |     |                                                                                                               |                 |
| 20 |                                 | 20c | Definition of analysis population relating to protocol non-adherence (eg, as randomised analysis), and any    |                 |
| 21 |                                 |     | statistical methods to handle missing data (eg, multiple imputation)                                          | 14              |
| 22 |                                 |     |                                                                                                               |                 |
| 23 |                                 |     |                                                                                                               |                 |
| 24 | <b>Methods: Monitoring</b>      |     |                                                                                                               |                 |
| 25 |                                 |     |                                                                                                               |                 |
| 26 | Data monitoring                 | 21a | Composition of data monitoring committee (DMC); summary of its role and reporting structure; statement of     | Not reported in |
| 27 |                                 |     | whether it is independent from the sponsor and competing interests; and reference to where further details    | manuscript      |
| 28 |                                 |     | about its charter can be found, if not in the protocol. Alternatively, an explanation of why a DMC is not     |                 |
| 29 |                                 |     | needed                                                                                                        |                 |
| 30 |                                 |     |                                                                                                               |                 |
| 31 |                                 | 21b | Description of any interim analyses and stopping guidelines, including who will have access to these interim  | 9, 14           |
| 32 |                                 |     | results and make the final decision to terminate the trial                                                    |                 |
| 33 |                                 |     |                                                                                                               |                 |
| 34 |                                 |     |                                                                                                               |                 |
| 35 | Harms                           | 22  | Plans for collecting, assessing, reporting, and managing solicited and spontaneously reported adverse         | 9               |
| 36 |                                 |     | events and other unintended effects of trial interventions or trial conduct                                   |                 |
| 37 |                                 |     |                                                                                                               |                 |
| 38 | Auditing                        | 23  | Frequency and procedures for auditing trial conduct, if any, and whether the process will be independent      | Not reported in |
| 39 |                                 |     | from investigators and the sponsor                                                                            | manuscript      |
| 40 |                                 |     |                                                                                                               |                 |
| 41 |                                 |     |                                                                                                               |                 |
| 42 | <b>Ethics and dissemination</b> |     |                                                                                                               |                 |
| 43 |                                 |     |                                                                                                               |                 |
| 44 |                                 |     |                                                                                                               |                 |
| 45 |                                 |     |                                                                                                               |                 |
| 46 |                                 |     |                                                                                                               |                 |
| 47 |                                 |     |                                                                                                               |                 |
| 48 |                                 |     |                                                                                                               |                 |
| 49 |                                 |     |                                                                                                               |                 |

|    |                               |     |                                                                                                                                                                                                                                                                                     |                            |
|----|-------------------------------|-----|-------------------------------------------------------------------------------------------------------------------------------------------------------------------------------------------------------------------------------------------------------------------------------------|----------------------------|
| 1  |                               |     |                                                                                                                                                                                                                                                                                     |                            |
| 2  |                               |     |                                                                                                                                                                                                                                                                                     |                            |
| 3  | Research ethics approval      | 24  | Plans for seeking research ethics committee/institutional review board (REC/IRB) approval                                                                                                                                                                                           | 6                          |
| 4  |                               |     |                                                                                                                                                                                                                                                                                     |                            |
| 5  |                               |     |                                                                                                                                                                                                                                                                                     |                            |
| 6  | Protocol amendments           | 25  | Plans for communicating important protocol modifications (eg, changes to eligibility criteria, outcomes, analyses) to relevant parties (eg, investigators, REC/IRBs, trial participants, trial registries, journals, regulators)                                                    | Not reported in manuscript |
| 7  |                               |     |                                                                                                                                                                                                                                                                                     |                            |
| 8  |                               |     |                                                                                                                                                                                                                                                                                     |                            |
| 9  |                               |     |                                                                                                                                                                                                                                                                                     |                            |
| 10 | Consent or assent             | 26a | Who will obtain informed consent or assent from potential trial participants or authorised surrogates, and how (see Item 32)                                                                                                                                                        | Not reported in manuscript |
| 11 |                               |     |                                                                                                                                                                                                                                                                                     |                            |
| 12 |                               |     |                                                                                                                                                                                                                                                                                     |                            |
| 13 |                               | 26b | Additional consent provisions for collection and use of participant data and biological specimens in ancillary studies, if applicable                                                                                                                                               | N/A                        |
| 14 |                               |     |                                                                                                                                                                                                                                                                                     |                            |
| 15 |                               |     |                                                                                                                                                                                                                                                                                     |                            |
| 16 | Confidentiality               | 27  | How personal information about potential and enrolled participants will be collected, shared, and maintained in order to protect confidentiality before, during, and after the trial                                                                                                | 10, 13                     |
| 17 |                               |     |                                                                                                                                                                                                                                                                                     |                            |
| 18 |                               |     |                                                                                                                                                                                                                                                                                     |                            |
| 19 | Declaration of interests      | 28  | Financial and other competing interests for principal investigators for the overall trial and each study site                                                                                                                                                                       | 16                         |
| 20 |                               |     |                                                                                                                                                                                                                                                                                     |                            |
| 21 |                               |     |                                                                                                                                                                                                                                                                                     |                            |
| 22 | Access to data                | 29  | Statement of who will have access to the final trial dataset, and disclosure of contractual agreements that limit such access for investigators                                                                                                                                     | Not reported in manuscript |
| 23 |                               |     |                                                                                                                                                                                                                                                                                     |                            |
| 24 |                               |     |                                                                                                                                                                                                                                                                                     |                            |
| 25 | Ancillary and post-trial care | 30  | Provisions, if any, for ancillary and post-trial care, and for compensation to those who suffer harm from trial participation                                                                                                                                                       | Not reported in manuscript |
| 26 |                               |     |                                                                                                                                                                                                                                                                                     |                            |
| 27 |                               |     |                                                                                                                                                                                                                                                                                     |                            |
| 28 |                               |     |                                                                                                                                                                                                                                                                                     |                            |
| 29 | Dissemination policy          | 31a | Plans for investigators and sponsor to communicate trial results to participants, healthcare professionals, the public, and other relevant groups (eg, via publication, reporting in results databases, or other data sharing arrangements), including any publication restrictions | 1                          |
| 30 |                               |     |                                                                                                                                                                                                                                                                                     |                            |
| 31 |                               |     |                                                                                                                                                                                                                                                                                     |                            |
| 32 |                               |     |                                                                                                                                                                                                                                                                                     |                            |
| 33 |                               | 31b | Authorship eligibility guidelines and any intended use of professional writers                                                                                                                                                                                                      | N/A                        |
| 34 |                               |     |                                                                                                                                                                                                                                                                                     |                            |
| 35 |                               | 31c | Plans, if any, for granting public access to the full protocol, participant-level dataset, and statistical code                                                                                                                                                                     | 16                         |
| 36 |                               |     |                                                                                                                                                                                                                                                                                     |                            |
| 37 | <b>Appendices</b>             |     |                                                                                                                                                                                                                                                                                     |                            |
| 38 |                               |     |                                                                                                                                                                                                                                                                                     |                            |
| 39 | Informed consent materials    | 32  | Model consent form and other related documentation given to participants and authorised surrogates                                                                                                                                                                                  | Not reported in manuscript |
| 40 |                               |     |                                                                                                                                                                                                                                                                                     |                            |
| 41 |                               |     |                                                                                                                                                                                                                                                                                     |                            |
| 42 |                               |     |                                                                                                                                                                                                                                                                                     |                            |
| 43 |                               |     |                                                                                                                                                                                                                                                                                     |                            |
| 44 |                               |     |                                                                                                                                                                                                                                                                                     |                            |
| 45 |                               |     |                                                                                                                                                                                                                                                                                     |                            |
| 46 |                               |     |                                                                                                                                                                                                                                                                                     |                            |
| 47 |                               |     |                                                                                                                                                                                                                                                                                     |                            |
| 48 |                               |     |                                                                                                                                                                                                                                                                                     |                            |
| 49 |                               |     |                                                                                                                                                                                                                                                                                     |                            |



1  
2  
3  
4  
5  
6  
7  
8  
9  
10  
11  
12  
13  
14  
15  
16  
17  
18  
19  
20  
21  
22  
23  
24  
25  
26  
27  
28  
29  
30  
31  
32  
33  
34  
35  
36  
37  
38  
39  
40  
41  
42  
43  
44  
45  
46  
47  
48  
49

|                      |    |                                                                                                                                                                                                |     |
|----------------------|----|------------------------------------------------------------------------------------------------------------------------------------------------------------------------------------------------|-----|
| Biological specimens | 33 | Plans for collection, laboratory evaluation, and storage of biological specimens for genetic or molecular analysis in the current trial and for future use in ancillary studies, if applicable | N/A |
|----------------------|----|------------------------------------------------------------------------------------------------------------------------------------------------------------------------------------------------|-----|

---

\*It is strongly recommended that this checklist be read in conjunction with the SPIRIT 2013 Explanation & Elaboration for important clarification on the items. Amendments to the protocol should be tracked and dated. The SPIRIT checklist is copyrighted by the SPIRIT Group under the Creative Commons "[Attribution-NonCommercial-NoDerivs 3.0 Unported](#)" license.

For peer review only

# BMJ Open

## Bi-modal stimulation in the treatment of tinnitus: a study protocol for an exploratory trial to optimise stimulation parameters and patient subtyping

|                                 |                                                                                                                                                                                                                                                                                                                                                                   |
|---------------------------------|-------------------------------------------------------------------------------------------------------------------------------------------------------------------------------------------------------------------------------------------------------------------------------------------------------------------------------------------------------------------|
| Journal:                        | <i>BMJ Open</i>                                                                                                                                                                                                                                                                                                                                                   |
| Manuscript ID                   | bmjopen-2017-018465.R1                                                                                                                                                                                                                                                                                                                                            |
| Article Type:                   | Protocol                                                                                                                                                                                                                                                                                                                                                          |
| Date Submitted by the Author:   | 10-Aug-2017                                                                                                                                                                                                                                                                                                                                                       |
| Complete List of Authors:       | D'Arcy, Shona; Neuromod Devices, ; Hamilton, Caroline; Neuromod Devices Hughes, Stephen; Neuromod Devices Hall, Deborah; University of Nottingham, NIHR Nottingham Hearing Biomedical Research Unit Vanneste, Sven; University of Texas at Dallas Langguth, Berthold ; University of Regensburg at the District Hospital Conlon, Brendan; St. James Hospital, ENT |
| <b>Primary Subject Heading</b>: | Neurology                                                                                                                                                                                                                                                                                                                                                         |
| Secondary Subject Heading:      | Ear, nose and throat/otolaryngology, Neurology                                                                                                                                                                                                                                                                                                                    |
| Keywords:                       | Tinnitus, Neuromodulation, Bi-modal stimulation                                                                                                                                                                                                                                                                                                                   |
|                                 |                                                                                                                                                                                                                                                                                                                                                                   |

SCHOLARONE™  
Manuscripts

Only

1  
2  
3 **Title: Bi-modal stimulation in the treatment of tinnitus: a study protocol for an**  
4 **exploratory trial to optimise stimulation parameters and patient subtyping**  
5  
6  
7  
8  
9

10  
11  
12 Authors: Shona D'Arcy<sup>1</sup>, Caroline Hamilton<sup>1</sup>, Stephen Hughes<sup>1</sup>, Deborah A Hall<sup>2,3</sup>, Sven  
13 Vanneste<sup>4</sup>, Berthold Langguth<sup>5,6</sup>, Brendan Conlon<sup>1,7,8</sup>  
14  
15  
16

- 17  
18  
19  
20 1. Neuromod Devices Limited, Dublin, Republic of Ireland  
21  
22 2. National Institute for Health Research Nottingham Biomedical Research Centre, UK  
23  
24 3. Otology and Hearing group, Division of Clinical Neuroscience, University of Nottingham,  
25 UK  
26  
27 4. Lab for Clinical and Integrative Neuroscience, School of Behavioral and Brain Sciences,  
28 The University of Texas at Dallas, USA  
29  
30 5. Department of Psychiatry and Psychotherapy, University of Regensburg, Regensburg,  
31 Germany  
32  
33 6. Interdisciplinary Tinnitus Center of the University of Regensburg, Regensburg, Germany  
34  
35 7. Tallaght Hospital and St. James's Hospital, Dublin, Republic of Ireland  
36  
37 8. Department of Medicine, Trinity College, Dublin, Republic of Ireland  
38  
39  
40  
41  
42  
43  
44

45 **Running Title:** Bi-modal stimulation in the treatment of tinnitus  
46

47 **Keywords:** Tinnitus, Bi-modal stimulation, neuromodulation  
48  
49  
50  
51  
52  
53  
54

55 **Correspondence to:** shona.darcy@neuromoddevices.com  
56  
57  
58  
59  
60

## ABSTRACT

**Introduction:** Tinnitus is the perception of sound in the absence of a corresponding external acoustic stimulus. Bi-modal neuromodulation is emerging as a promising treatment for this condition. The main objectives of this study are to investigate the relevance of inter-stimuli timing and the choice of auditory stimuli for a proprietary bi-modal (auditory and somatosensory) neuromodulation device and to explore whether specific subtypes of patients are differentially responsive to this novel intervention for reducing the symptoms of chronic tinnitus.

**Methods and analysis:** This is a two-site, randomised, triple-blind, exploratory study of a proprietary neuromodulation device with a pre-post and 12-month follow-up design. Three different bi-modal stimulation parameter sets will be examined. The study will enrol 342 patients, split 80:20 between two sites (Dublin, Ireland and Regensburg, Germany), to complete 12 weeks of treatment with the device. Patients will be allocated to one of three arms using a step-wise stratification according to four binary categories: tinnitus tonality, sound level tolerance (using Loudness Discomfort Level of <60 dB SL as an indicator for hyperacusis), hearing thresholds, and presence of a noise-induced audiometric profile. The main indicators of relative clinical efficacy for the three different parameter sets are two patient-reported outcomes measures, the Tinnitus Handicap Inventory and the Tinnitus Functional Index, after 12 weeks of intervention. Clinical efficacy will be further explored in a series of patient subtypes, split by the stratification variables and by presence of a somatic tinnitus. Evidence for sustained effects on the psychological and functional impact of tinnitus will be followed up for 12 months. Safety data will be collected and reported. A number of feasibility measures to inform future trial design include: reasons for exclusion, completeness of data collection, attrition rates, patient's adherence to the device usage as per manufacturer's instructions and evaluation of alternative methods for estimating tinnitus impact and tinnitus loudness.

**Ethics and dissemination:** This study protocol is approved by the Tallaght Hospital / St. James's Hospital Joint Research Ethics Committee in Dublin, Republic of Ireland, and by the

1  
2  
3 Ethics Committee of the University Clinic Regensburg, Germany. Findings will be  
4  
5 disseminated to relevant research, clinical, health service and patient communities through  
6  
7 publications in peer-reviewed and popular science journals and presentations at scientific  
8  
9 and clinical conferences.

10  
11 **Trial registration number;** the trial is registered on ClinicalTrials.gov (NCT02669069). The  
12  
13 sponsor is Neuromod Devices, Dublin, Republic of Ireland.

#### 14 15 **STRENGTHS AND LIMITATIONS OF THIS STUDY**

- 16  
17  
18 • The main strength of this study is that it is a large two-site, triple-blinded, randomised  
19  
20 trial that will provide exploratory evidence of the relevance of stimulation parameters  
21  
22 on the clinical efficacy of different bi-modal stimulation parameters and will inform  
23  
24 future trial design.
- 25  
26 • The study comprehensively characterises patients for subtyping and this will refine  
27  
28 candidature for the intervention.
- 29  
30 • Among the limitations of this study are the variability in duration between screening  
31  
32 and enrolment and the selection of the investigated stimulation parameters.
- 33  
34 • The online recruitment process may inadvertently introduce participant selection bias.  
35  
36  
37  
38  
39  
40  
41  
42  
43  
44  
45  
46  
47  
48  
49  
50  
51  
52  
53  
54  
55  
56  
57  
58  
59  
60

## INTRODUCTION

Tinnitus is the perception of sound in the absence of a corresponding external acoustic stimulus. The condition is most commonly referred to as 'ringing in the ears' but symptoms can manifest as buzzing, hissing or sizzling. Tinnitus often coincides with hearing loss and it is commonly believed that hearing loss may be a contributory factor (1). While the exact mechanisms responsible for tinnitus are yet to be fully elucidated, it is believed that the reduction in peripheral auditory input, due to hearing loss, results in pathological behaviours that are misinterpreted as sound within the central auditory systems (2).

Tinnitus has traditionally been treated by means of acoustic stimulation with limited success (3). Systematic reviews highlight a lack of double-blind, randomised, controlled studies or quality clinical evidence supporting the efficacy of acoustic stimulation in treating tinnitus (4). This has lead researchers to investigate approaches to treating tinnitus that go beyond acoustic stimulation.

One approach that has been increasingly investigated in the last decade is invasive and non-invasive neuromodulation of brain structures and networks involved in tinnitus generation (5, 6). Neuromodulation is defined as the process of inhibition, stimulation, modification, regulation, or alteration of electrical activity in the central, peripheral, or autonomic nervous systems (7). It is the science of how electrical stimulation can modulate nervous system functionality for therapeutic benefit. Neuromodulation approaches of the central nervous system for the treatment of tinnitus include repetitive transcranial magnetic stimulation, transcranial direct current stimulation and epidural stimulation of temporal, temporoparietal and frontal brain areas. All these approaches have resulted in reduction of tinnitus handicap in a subgroup of patients (8, 9, 10, 11). Targeted modification of central nervous activity by neurofeedback has also been proposed as a therapeutic approach for tinnitus. In addition, a limited number of uncontrolled pilot studies have been conducted to assess the safety and initial efficacy of neuromodulation employing cranial nerve stimulation for tinnitus treatment in humans.

1  
2  
3 To date, a limited number of uncontrolled pilot studies have been conducted to assess the  
4 safety and initial efficacy of neuromodulation employing cranial nerve stimulation for tinnitus  
5 treatment in humans. These have included invasive vagus nerve stimulation (VNS) (12),  
6 non-invasive stimulation of the vagus nerve (13, 14) and non-invasive Cervico-Trigeminal  
7 Nerve Stimulation (CTNS) (15, 16). While VNS demonstrated promising results in animals  
8 (17), human studies have demonstrated mixed results (12, 18, 14). Human studies using  
9 non-invasive CTNS have demonstrated promising initial efficacy (15, 16). However, these  
10 results should be considered preliminary as the data stems from small pilot studies. The  
11 intervention evaluated by Hamilton and colleagues (2016) utilised synchronised auditory and  
12 somatosensory stimulation. However, recent animal research suggests that inter-stimuli  
13 timing intervals may play an important part in the effectiveness of bi-modal auditory and  
14 somatosensory stimulation on tinnitus (19). This theory is supported by the findings of a  
15 recent 20-patient human pilot study (16). Similarly, there is debate in the literature about the  
16 choice of auditory stimuli and whether this should stimulate frequency channels associated  
17 with sensorineural hearing loss (CTNS approach) (15) or frequency channels not associated  
18 with hearing loss (VNS approach) (12). Progression to randomised, controlled trials (RCT)  
19 with adequately powered sample size is needed. This study protocol represents the first  
20 important step towards that goal.  
21  
22  
23  
24  
25  
26  
27  
28  
29  
30  
31  
32  
33  
34  
35  
36  
37  
38  
39  
40

### 41 **Hypothesis and aims**

42  
43  
44 The main objectives of the study described here are to investigate the relevance of inter -  
45 and intra - stimuli timing and the choice of auditory stimulation in order to optimise bi-modal  
46 stimulation parameters for this treatment. Exploratory analyses will be conducted to  
47 investigate whether subtypes of patients are differentially responsive to this novel  
48 intervention. Safety data will also be collected and reported. Additional feasibility outcomes  
49 concern methodological and procedural uncertainties when this novel medical device is  
50 prescribed and fitted in a large sample of patients.  
51  
52  
53  
54  
55  
56  
57  
58  
59  
60

## METHODS AND ANALYSIS

### Trial design

The Treatment Evaluation of Neuromodulation for Tinnitus (TENT) study is a two-site, randomised, triple-blind, exploratory study examining three different bi-modal stimulation parameter sets. The treatment duration is 12-weeks and patients are followed up at 6 weeks, 6 months and 12 months post treatment cessation. TENT will be conducted at two sites: Wellcome Trust-HRB Clinical Research Facility, St. James's Hospital, Dublin, Ireland and Tinnituszentrum Regensburg, University of Regensburg, Germany. The protocol was independently reviewed and approved by Research Ethics Committees of the Tallaght Hospital/St James' Hospital (Ref: 2016-03-List 11(3)) and the University Clinic Regensburg (Ref: 16-101-0186). The trial sponsor is Neuromod Devices Limited. The trial was registered on ClinicalTrials.gov on 27 January 2016 (Identifier: NCT02669069). The first patient was consented in 22 March 2016 with the last visit planned for May 2018. Our reporting follows standard protocol items for clinical trials defined in the SPIRIT 2013 Statement (20).

### Eligibility criteria

Eligible patients will be aged 18-70 years at screening; self-report having experienced tinnitus for more than 3 months and less than 5 years; score between 28 and 76 points on the Tinnitus Handicap Inventory (THI), have a Minimum Masking Level (MML) measurement between 20-80 decibels Hearing Level (dB HL), be able to read and understand English or German (depending on the recruiting centre) and be willing to commit to the duration of the programme.

Potential patients will be excluded if they have pulsatile tinnitus (rhythmical sounds that often beat in time with the heartbeat), tinnitus caused by head or neck injury, or tinnitus resulting from any other neurological condition. Signs of a conductive hearing loss demonstrated by abnormal otoscopy or tympanometry are exclusion criteria; as is a sensorineural hearing loss in either ear of greater than 40 dB HL in at least in one measurement frequency in the



1  
2  
3 range 0.25-1.00 kHz, or of greater than 80 dB HL in at least one measurement frequency in  
4  
5 the range 2.0-8.0 kHz. Exclusions also include those patients who began wearing a hearing  
6  
7 aid within the last 90 days, those with any type of electro-active implantable device (e.g.  
8  
9 vagal nerve stimulator, cochlear implant or a cardio-pacemaker) and those with the following  
10  
11 conditions that can be co-morbid with tinnitus: Ménière's disease, Loudness Discomfort  
12  
13 Level for sounds presented below 30 dB Sensation Level (SL), Temporomandibular Joint  
14  
15 disorder (TMJ) and anxiety determined by a score greater than 120 out of 160 on the State-  
16  
17 Trait Anxiety Inventory (STAI) (21, 22). Moderate to severe dementia as indicated by a score  
18  
19 below 20 on the Mini-Mental State Examination (MMSE) (23) will also be sufficient reason  
20  
21 for exclusion. A final set of exclusion criteria based on medical history taken at the  
22  
23 screening assessment are: oral piercings, pregnancy, involvement in medico-legal cases,  
24  
25 history of auditory hallucinations, any current neurological conditions that may lead to loss of  
26  
27 consciousness (e.g. epilepsy), current prescription of any drug for a central nervous system  
28  
29 pathology and previous use of bi-modal neuromodulation devices. Finally, the Principal  
30  
31 Investigator does not deem the candidate to be suitable for the study for other reasons not  
32  
33 listed above.  
34  
35

### 36 **Intervention**

37  
38 All enrolled patients will receive a proprietary bi-modal auditory and somatosensory  
39  
40 neuromodulation device (MBT, Neuromod Devices Ltd., Dublin, Ireland), a CE-marked Class  
41  
42 IIa medical device. Auditory stimulation is delivered through high-fidelity circumaural  
43  
44 headphones, and comprises of a mixture of a wideband noise and sequences of pure tones.  
45  
46 Stimulation of the somatosensory system is delivered electrically using an array of 32  
47  
48 transmucosal electrodes on the tongue. Somatosensory stimulation is delivered in the form  
49  
50 of bi-phasic anodic pulses of between 5 and 130µs duration and fixed amplitude. The  
51  
52 somatosensory stimulator is arranged so that there is a unique mapping between each  
53  
54 electrode in the array and frequencies in the tone sequence. The stimuli for each parameter  
55  
56 set across the three arms are outlined in Table 1.  
57  
58  
59  
60

|       | Auditory stimulation                                                                                                                           | Temporal relationship with somatosensory stimulation                  |
|-------|------------------------------------------------------------------------------------------------------------------------------------------------|-----------------------------------------------------------------------|
| Arm 1 | Sequence of tones, mixed with a broadband noise that is spectrally modified to compensate for any hearing loss                                 | Somatosensory pulses are synchronous with the tones                   |
| Arm 2 | Sequence of tones, mixed with a broadband noise that is spectrally modified to compensate for any hearing loss                                 | Somatosensory pulses are asynchronous with the tones                  |
| Arm 3 | Sequence of tones mixed with a broadband noise with the spectral range outside the regions normally associated with sensorineural hearing loss | Somatosensory pulses are uncorrelated and asynchronous with the tones |

Table 1 Stimulation parameter set for the three parallel arms

The auditory stimulus intensity is configured uniquely based on each patient's pure-tone audiometric thresholds in the range 0.25 to 8 kHz, and the patient is afforded limited control over the auditory stimulus intensity of -12 dB to +12 dB in 2 dB steps during treatment. For patients with greater than 70 dB HL hearing loss at any frequency, the upper bound of stimulus intensity control is limited for reasons of safety noise dosage. The treatment device reverts to the default stimulus intensities at the start of each new treatment session. Any adjustments made by the patients to the stimulus intensities are logged in the device's memory for subsequent analysis.

The somatosensory stimulus intensity is configured for each patient at enrolment, based on a calibration procedure that ascertains the patient's threshold of perception. The patient is also afforded limited control over the somatosensory stimulus intensity during treatment.

The device logs the time and date on which the device is in use by the patient, the duration that the electrode array is in contact with the tongue, and the intensities of both stimuli.

1  
2  
3 Individually configured devices will be delivered to the investigator sites with a patient's  
4 Unique Identifier Code (UIC) numbers marked on each device and its accessories.  
5  
6 Investigators will be extensively trained on fitting the device and instructing patients on its  
7 use, per the manufacturer's instructions. Patients will be provided with a quick start guide, an  
8 Instructions for Use (IFU) manual and a link to an instructional video. Before leaving the  
9 clinical sites, patients will complete a 30-minute supervised treatment session to ensure they  
10 are comfortable using the device.  
11  
12  
13  
14  
15  
16  
17  
18  
19

### 20 **Outcomes**

21 Subjective clinical outcome measures to assess tinnitus impact, are the Tinnitus Handicap  
22 Index (THI) (24) and the Tinnitus Functional Index (TFI) (25). The THI provides a measure of  
23 the psychological impact of tinnitus, 25 items are scored 4/2/0 on a categorical scale  
24 corresponding to yes/sometimes/no. The global score of the THI has a value between 0 and  
25 100 with the higher scores indicating greater emotional distress. The TFI assesses a range  
26 of functional complaints experienced over the past week (26). Each of the 25 items is  
27 assessed on an 11 point Likert scale, the sum of the scores is normalised to give a global  
28 score between 0 and 100, with higher scores indicating greater negative functional impact of  
29 tinnitus.  
30  
31  
32  
33  
34  
35  
36  
37  
38  
39

40 Tinnitus loudness is assessed by MML, Tinnitus Loudness Matching (TLM) and Visual  
41 Analogue Scale (VAS). MML is a psychoacoustic estimate of the lowest level of broadband  
42 noise required to minimally mask the patient's tinnitus (27). The stimulus is normally  
43 presented ipsilaterally (tinnitus ear), or if tinnitus is present in both ears the stimulus is  
44 presented binaurally or to the ear with the predominate sound. TLM is assessed by  
45 presenting a 1-kHz tone (28) contralateral to the predominant tinnitus ear or if tinnitus is  
46 equally loud in both sides or localised in the head, the stimuli will be presented to the ear  
47 with better hearing or randomly selected. The stimulus is increased in 1 dB increments until  
48 the patient confirms that it is equal in loudness to their tinnitus. Finally, a VAS will be  
49  
50  
51  
52  
53  
54  
55  
56  
57  
58  
59  
60

1  
2  
3 employed for patients to rate the current loudness of their tinnitus, with zero equating to 'not  
4 loud at all' and ten equating to 'extremely loud', as the endpoints anchors (29).

5  
6 Safety data on Adverse Events (AEs) and Serious Adverse Events (SAEs) will be captured  
7 throughout the trial. An AE is defined as any unfavourable and unintended sign, symptom or  
8 disease, temporarily that may or may not be related to the medical device. It will be rated as  
9 minor, major or serious and related or unrelated to the device by the TENT Medical Review  
10 Board. An SAE is defined as an AE that led or might have led to the death or serious  
11 deterioration in the state of health of a patient. Treatment-related AEs are those judged by  
12 the Principal Investigator at each site to be possibly caused by the treatment under  
13 investigation. The Principal Investigator will remain vigilant for signs of possible treatment-  
14 related changes in oral health (e.g. irritations in the oral cavity or discomfort between the  
15 tongue tip and dental retainers or metal fillings), and the impact of tinnitus (indicated by the  
16 THI and TFI).

17  
18 Stopping criteria are defined as patients demonstrating a worsening in THI and MML of an  
19 increase in THI of 7pts and an increase in MML of 5.3dB. Treatment-related changes in  
20 hearing thresholds that are considered an AE are a deterioration from Screening to Endpoint  
21 of 15 dB in a minimum of two adjacent test frequencies (0.25-8 kHz) in either ear that cannot  
22 be explained by conductive hearing problem or a recent excessive noise exposure.

23  
24 Additionally, feasibility outcomes include: reasons for exclusion at the screening visit,  
25 number of patients who were eligible at the screening appointment but declined to  
26 participate further, number of patient withdrawals after device fitting, proportion of incomplete  
27 patient datasets at each scheduled visit, patients' compliance with the device usage as per  
28 manufacturer's instructions and comparisons of alternative methods for measuring the  
29 impact of tinnitus and for estimating tinnitus loudness.

30  
31 Compliance data will be extracted from log files saved on the device. For feasibility analysis,  
32 compliance rate will be expressed as a percentage of logged usage relative to i) the  
33 expected compliance as per the intended use for the device (a total of 84 hours over the 12-  
34 week period), and to a pre-defined minimum acceptable compliance threshold (defined as at  
35  
36  
37  
38  
39  
40  
41  
42  
43  
44  
45  
46  
47  
48  
49  
50  
51  
52  
53  
54  
55  
56  
57  
58  
59  
60

1  
2  
3 least 3 hours average usage within a 1-week period, corresponding to a sum total of 36  
4  
5 hours of treatment).  
6  
7

### 8 9 **Recruitment**

10 Patients are primarily recruited via media advertising and dedicated trial websites in both  
11  
12 clinical locations. Advertisements on regional and national radio stations and in regional and  
13  
14 national newspapers invite individuals with tinnitus, who are interested in participating in a  
15  
16 clinical study for tinnitus, to register their interest on dedicated recruitment websites. The  
17  
18 recruitment website provides information on the study and how to proceed with registration.  
19  
20 Once they register their interest, candidates will be provided with a UIC and an  
21  
22 accompanying Personal Identification Number and be directed to an eligibility assessment  
23  
24 website. The eligibility assessment comprises of an online survey, hosted by SurveyGizmo,  
25  
26 where those interested can find out about the requirements of participating in the study.  
27  
28 Candidates answer a scripted set of general pre-screening questions on age, duration of  
29  
30 tinnitus, oral piercings, other current medical conditions including temporomandibular joint  
31  
32 disorder and Ménière's disease and involvement in medico-legal cases. This is not part of  
33  
34 the formal screening because no personal or medical details will be taken, but it is intended  
35  
36 to manage the large numbers of candidates expected to respond to the advertising  
37  
38 campaign and anticipated high screen failure rate. Candidates who meet the inclusion  
39  
40 criteria at this stage will be provided with a Patient Information Leaflet and Informed Consent  
41  
42 via email or post and invited to a screening visit at the local site.  
43  
44  
45  
46  
47

### 48 **Patient timeline**

49 The schedule of clinical research activities is illustrated in Table 2 and briefly comprises of  
50  
51 seven visits to the clinical site, plus two telephone calls during the period of device usage.  
52  
53 The various assessments are completed by a multi-disciplinary team including: Audiologists,  
54  
55 Medical Doctors, Physiotherapist, Research Nurses and Research Associates.  
56  
57  
58  
59  
60

|                                                         | Screening   | Enrolment and fitting | Post-allocation      |               |                |                | Follow-up | Follow-up      | Follow-up      |
|---------------------------------------------------------|-------------|-----------------------|----------------------|---------------|----------------|----------------|-----------|----------------|----------------|
|                                                         | Screening   | Enrolment             | Telephone call       | Interim visit | Telephone call | Endpoint visit |           |                |                |
| TIMEPOINT                                               | Wks 0 to 10 | wk1                   | wk3                  | wk6           | wk9            | wk12           | wk18      | wk36           | wk60           |
| <b>ENROLMENT:</b>                                       |             |                       |                      |               |                |                |           |                |                |
| Eligibility screen                                      | X           |                       |                      |               |                |                |           |                |                |
| Informed consent                                        | X           |                       |                      |               |                |                |           |                |                |
| Allocation                                              |             | X                     |                      |               |                |                |           |                |                |
| Training on how to use the device                       |             | X                     |                      |               |                |                |           |                |                |
| Review of device usage data log with participant        |             |                       |                      | X             |                |                |           |                |                |
| Encourage compliance                                    |             | X                     | X                    | X             | X              |                |           |                |                |
| Return device                                           |             |                       |                      |               |                | X              |           |                |                |
| <b>INTERVENTIONS:</b>                                   |             |                       |                      |               |                |                |           |                |                |
| Arm 1                                                   |             |                       | ◆──────────────────◆ |               |                |                |           |                |                |
| Arm 2                                                   |             |                       | ◆──────────────────◆ |               |                |                |           |                |                |
| Arm 3                                                   |             |                       | ◆──────────────────◆ |               |                |                |           |                |                |
| <b>ASSESSMENTS:</b>                                     |             |                       |                      |               |                |                |           |                |                |
| Medical history                                         | X           |                       |                      |               |                |                |           |                |                |
| Previous or concomitant medications/illnesses           |             | X                     |                      | X             |                | X              | X         | X              | X              |
| Tinnitus location & tonality                            | X           | X                     |                      | X             |                | X              | X         | X              | X              |
| Audiometric tests of hearing                            | X           |                       |                      |               |                |                |           |                |                |
| Loudness Discomfort Level                               | X           |                       |                      |               |                | X              |           |                |                |
| Mini-Mental Stat Examination                            | X           |                       |                      |               |                |                |           |                |                |
| Somatic assessment                                      |             | X                     |                      |               |                |                |           |                |                |
| Oral assessment                                         |             | X                     |                      |               |                | X              |           |                |                |
| Regensburg Insomnia Scale                               |             | X                     |                      |               |                | X              |           |                |                |
| State-Trait Anxiety Inventory                           | X           |                       |                      | X             |                | X              |           |                |                |
| Tinnitus Functional Index                               | X           | X                     |                      | X             |                | X              | X         | X              | X              |
| Minimum Masking Level                                   | X           | X                     |                      | X             |                | X              | X         | X              | X              |
| Tinnitus Loudness Matching                              | X           | X                     |                      | X             |                | X              | X         | X              | X              |
| Tinnitus Handicap Inventory                             | X           | X                     |                      | X             |                | X              | X         | X              | X              |
| Visual Analogue Scales (loudness and intrusiveness)     | X           |                       |                      |               |                | X              | X         | X              | X              |
| Adverse events                                          |             | X                     |                      | X             |                | X              | X         | X              | X              |
| Clinical Global Impression (loudness and intrusiveness) |             |                       |                      | X             |                | X              |           |                |                |
| Device usability questionnaire                          |             |                       |                      |               |                | X              |           |                |                |
| Hyperacusis questionnaire                               |             |                       |                      |               |                |                |           | X <sup>1</sup> | X <sup>2</sup> |

Table 2. Schedule of Assessment, <sup>1</sup> Dublin, <sup>2</sup> Germany

The initial objective of the Screening visit is to obtain written informed consent, to determine whether the patient satisfies the remaining eligibility criteria and to obtain initial outcome measures, patient characteristics and audiological profile. This information is employed in the subtype classification of patients, the stratified random allocation process and for device configuration, described below.

At the Enrolment and device fitting visit, a Physiotherapist (Dublin) or Medical Doctor (Regensburg) conducts a comprehensive assessment comprising of a set of 25 pre-defined

1  
2  
3 cranial manipulations designed to diagnose somatic tinnitus (30). We define somatic tinnitus  
4 where a patient reports that at least one of the somatic manipulations reliably produces a  
5 change in the psychoacoustic characteristics of their tinnitus (e.g. in pitch, loudness,  
6 localisation, temporal properties etc). Assessments of outcome measures are repeated at  
7 the Enrolment visit. Other elements of the visit include an oral health examination and device  
8 training and deployment. After completing an on-site supervised treatment session, patients  
9 return home and self-administer the treatment. Patients will be instructed to use the device  
10 for two daily 30-minute sessions over a 12-week period. These sessions can be continuous  
11 or at different times of the day.

12  
13 Assessment of outcome measures and safety information are collected at the Interim visit,  
14 half way through the 12-week treatment. Compliance will also be assessed and reviewed at  
15 the Interim visit. Investigators will review the device usage log. Patients with acceptable  
16 compliance will be encouraged to continue and patients with poor compliance will be  
17 encouraged to improve. Compliance phone calls will be conducted at weeks 3 and 9 to  
18 encourage patients to continue with device usage and address any technical issues that  
19 patients may be having.

20  
21 The purpose of the End-point visit is to repeat outcome measures assessments, the oral  
22 health examination, an exit interview and retrieve the device. Three follow-up visits will be  
23 conducted to assess the post cessation effects of this intervention.

### 24 25 26 27 28 29 30 31 32 33 34 35 36 37 38 39 40 41 42 43 44 **Sample size**

45 The study is powered for a between-arm clinically significant difference in the mean THI  
46 scores from Baseline to End-point, where the reported clinically significant change in THI is 7  
47 points (31). The assumed sample standard deviation is 12.7 points, as elucidated from a  
48 previous study using similar technology (11), resulting in an effect size of 0.55. The sample  
49 size calculations were performed using Matlab 2016a, assuming a two-sided significance  
50 level of 0.016 (0.05 split equally between the three inter-arm pairwise t-tests), and power of  
51 90%, resulting in a total of 91 patients to be enrolled in each treatment arm, or 114 patients  
52  
53  
54  
55  
56  
57  
58  
59  
60

1  
2  
3 per arm to account for an expected drop-out rate of 20%. In total, 342 patients will be  
4  
5 required across the three arms of the study, split 80:20 between the Dublin and Regensburg  
6  
7 sites respectively.  
8  
9

### 10 11 **Allocation**

12  
13 Eligible patients will be randomised, in equal proportions, between the three parallel arms  
14  
15 (see Figure 1). Stratified randomisation will be performed to balance the influence of several  
16  
17 baseline co-variables in the post-hoc analyses. The stratification co-variables are chosen  
18  
19 based on the investigator's research objectives, namely to elucidate relative treatment  
20  
21 effects on tinnitus patients with varying underlying characteristics. Allocation of patients will  
22  
23 be stratified across the three intervention arms according to four binary categories applied in  
24  
25 a step-wise manner: i) tinnitus tonality, ii) sound level tolerance (using Loudness Discomfort  
26  
27 Level of <60 dB SL as an indicator for hyperacusis), iii) 'Normo-acoustic' (defined as pure-  
28  
29 tone thresholds of 20dB HL or less in all audiometric test frequencies between 0.25 and 8  
30  
31 kHz in both ears), and iv) presence of a noise-induced audiometric profile (defined as a dip  
32  
33 in pure-tone hearing thresholds of 10dB or more in any frequency in the 3 to 6 kHz range in  
34  
35 any ear). These co-variables are not mutually exclusive, so priority during stratified  
36  
37 randomisation will be given to the least prevalent co-variables based on candidate  
38  
39 characteristics from the screening phase of the study.  
40

41  
42 The stratification and randomisation will be performed adaptively (Minimisation) (32),  
43  
44 whereby the probability of assignment to a treatment intervention changes as the imbalance  
45  
46 within the relevant stratum increases. Dice rolls emulated in Matlab's Mersenne Twister  
47  
48 algorithm (version 2016a) will be used with the randomisation seed set to the date each new  
49  
50 block of patients is randomised.  
51  
52  
53  
54  
55  
56  
57  
58  
59  
60



### Data collection methods

All data will be collected electronically using a validated electronic Case Report Form (eCRF) application. Patient data collected at all stages of the trial will be entered into the eCRF using UIC's assigned to patients at recruitment phase. All investigators and patients will be blinded to allocation arm and no allocation information will be contained in the eCRF. The data monitors will be able to remotely view the data in the eCRF to monitor safety data.

### Statistical Methods

The main indicators of clinical efficacy for the three different parameter sets are two patient-reported outcomes (THI and TFI) after 12 weeks of intervention. Baseline outcome measures are computed as the average scores at the Screening and Enrolment visits. Clinical efficacy will be explored for a series of patient subtypes, split by the stratification variables, while evidence for sustained effects on the psychological and functional impact of tinnitus will be followed up for 12 months. Additional feasibility measures to inform future trial design include: reasons for exclusion, completeness of data collection, attrition rates, patients' adherence to the device usage as per manufacturer's instructions. These will be collated using descriptive statistics and reported as percentages. We will also evaluate the alternative methods for estimating tinnitus impact and tinnitus loudness, as far as possible using psychometric criteria defined by the COSMIN checklist (33).

Efficacy analyses will focus on investigating i) between-arm changes in the THI and TFI outcome measures from Baseline to End-point, and ii) within-arm changes in THI and TFI outcome measures from Baseline to End-point, for the full cohort and then sequentially testing the subtypes described above using serial gatekeeping to control the family-wise error rate at the 0.05 significance level. The between-arm analyses will be based on an intention-to-treat estimand and tested with multiple regression utilising Baseline scores as a covariate. Missing data will be handled by using Markov chain Monte Carlo multiple imputation methods (34,35). The within-arm analyses will be based on a per-protocol estimand and tested with paired two-tailed t-tests. The use of per-protocol estimand will

1  
2  
3 ensure that the changes in outcome measures within a particular treatment arm are  
4 reflective of real-use scenarios, i.e. where the patients use the treatment as directed. The  
5 threshold for inclusion in the per-protocol analysis is set at the pre-defined minimum  
6 acceptable compliance threshold previously described. Additional exploratory efficacy  
7 analyses shall be conducted in order to ascertain treatment effects from Baseline to Interim  
8 (i.e. 6 weeks of treatment), and to evaluate any sustained efficacy by analysing changes in  
9 efficacy outcome measures from End-point to the three Follow-up assessments (i.e. at 18,  
10 36 and 60 weeks after device fitting).

11  
12  
13 Safety analyses will be performed by evaluating the incidence of adverse events, classified  
14 as treatment or non-treatment related, and further sub-classified as Minor, Major and  
15 Serious. Adverse events will be recorded proactively, by monitoring significant changes in  
16 THI, TFI, MML, hearing thresholds and oral health, and reactively by documenting any  
17 adverse events reported by patients during the study. All adverse events will be analysed for  
18 trends, and statistical tests for significant between-arm differences will be conducted.

19  
20  
21 Efficacy and safety data analysis will be conducted in compliance with the Consolidated  
22 Standards of Reporting Trials (CONSORT) guidelines for randomised controlled trials (36)  
23 using the SAS software package.

### 24 25 26 27 28 29 30 31 32 33 34 35 36 37 38 39 40 41 42 43 44 45 46 47 48 49 50 51 52 53 54 55 56 57 58 59 60

### Dissemination

Findings will be disseminated to relevant research, clinical, health service and patient communities through publications in peer-reviewed and popular science journals and presentations at scientific and clinical conferences.

## DISCUSSION

This paper outlines the protocol for a multi-site, randomised, triple-blind, exploratory study designed to explore the effects of different bi-modal stimulation parameter sets across a number of tinnitus subtypes in a range of tinnitus clinical subdomains. The results of this study will inform the design of future triple-blind randomised control trials. The main objective

1  
2  
3 is to determine an optimised bi-modal stimulation parameter set, but we will also explore  
4  
5 which patient characteristics might best predict therapeutic benefit in that treatment arm. We  
6  
7 anticipate that this could lead to improved targeted intervention options for people with  
8  
9 chronic subjective tinnitus.

10  
11  
12  
13 This study is timely for several reasons. First, completing this exploratory trial will be  
14  
15 important in determining any feasibility challenges and will be used to estimate the time,  
16  
17 resources and sample size required for a full-scale RCT to answer the definitive question of  
18  
19 clinical efficacy. Second, findings from this study could potentially inform the acceptability of  
20  
21 bimodal stimulation in the wider population. There is a real need for effective therapeutic  
22  
23 options that reduce or alleviate the tinnitus percept instead of simply helping people to  
24  
25 manage the cognitive, emotional and behaviour impacts of their symptoms or to accept their  
26  
27 long-term condition (3). Third, low quality clinical trial design and reporting has been  
28  
29 identified as a major barrier to developing effective tinnitus therapies and standards of  
30  
31 practice have been proposed (37, 38, 39). The study design and protocol description is in  
32  
33 line with those recommendations.  
34  
35  
36

37 **AUTHORS' CONTRIBUTIONS:** SD, CH, SH and BC conceived of the study. SD, CH, SH  
38  
39 initiated the study design. SH provided statistical expertise in clinical trial design. BL, SV and  
40  
41 DAH are members of the Science Advisory Board for Neuromod Devices Ltd and contributed  
42  
43 to the Clinical Investigation Plan and the Statistical Analysis Plan, on which the protocol is  
44  
45 based. BL and BC are Principal Investigators at the two trial sites. All authors contributed to  
46  
47 the refinement of the study protocol and approved the final manuscript. SD submitted the  
48  
49 manuscript for publication.  
50

51 **FUNDING STATEMENT:** This work was supported by Neuromod Devices Ltd.  
52

53 **COMPETING INTERESTS STATEMENT:** SD, CH, SH, and BC are employees and  
54  
55 shareholders of the Sponsor. BL, SV and DAH act as paid consultants for the Sponsor.  
56  
57

58 **DATA SHARING STATEMENT:** The data from this study will not be shared publicly shared.  
59  
60

## References

1. Lockwood AH, Salvi RJ, Burkard RF. Tinnitus. *N. Engl. J. Med.* 2002;347(12): 904–910.
2. Eggermont JJ, Roberts LE. The neuroscience of tinnitus. *Trends Neurosci.* 2004;27(11): 676–682.
3. Hoare DJ, Kowalkowski VL, Kang S, Hall DA. Systematic review and meta-analyses of randomized controlled trials examining tinnitus management. *The Laryngoscope* 2011;121(7):1555–1564.
4. Hoare DJ, Edmondson-Jones M, Sereda M, Akeroyd MA, Hall D. Amplification with hearing aids for patients with tinnitus and co-existing hearing loss. *Cochrane Database of Systematic Reviews* 2014;1: Art. No.: CD010151. doi: 10.1002/14651858.CD010151.pub2
5. Langguth B, De Ridder D. Tinnitus: therapeutic use of superficial brain stimulation. *Handb. Clin. Neurol.* 2013;116:441–467. doi: 10.1016/B978-0-444-53497-2.00036-X.
6. Vanneste S, De Ridder D. Noninvasive and invasive neuromodulation for the treatment of tinnitus: an overview. *Neuromodulation Technol. Neural Interface* 2012;15(4):350–360. doi: 10.1111/j.1525-1403.2012.00447.x.
7. Krames ES, Peckham PH, Rezai AR, Aboelsaad F. What is Neuromodulation? In: Krames ES, Peckham PH, Rezai AR, editors. *Neuromodulation*. San Diego: Academic Press; 2009. pp. 3–8.
8. De Ridder D, Song J-J, Vanneste S. Frontal Cortex TMS for Tinnitus. *Brain Stimulation*, 2013;6(3):355–362. doi:10.1016/j.brs.2012.07.002
9. Folmer RL, Theodoroff SM, Casiana L, Shi Y, Griest S, Vachhani J. Repetitive Transcranial Magnetic Stimulation Treatment for Chronic Tinnitus: A Randomized Clinical Trial. *JAMA Otolaryngology–Head & Neck Surgery* 2015;141(8):716. doi:10.1001/jamaoto.2015.1219
10. Rabau, S, Van Rompaey V, Van de Heyning P. The effect of Transcranial Direct Current Stimulation in addition to Tinnitus Retraining Therapy for treatment of chronic tinnitus patients:

- 1  
2  
3 a study protocol for a double-blind controlled randomised trial. *Trials* 2015;16(1).  
4 doi:10.1186/s13063-015-1041-2  
5  
6  
7  
8 11. De Ridder D, Vanneste S, Kovacs S, Sunaert S, Menovsky T, van de Heyning P, Moller A.  
9 Transcranial magnetic stimulation and extradural electrodes implanted on secondary auditory  
10 cortex for tinnitus suppression: Clinical article. *Journal of Neurosurgery* 2011;114(4):903–911.  
11 doi:10.3171/2010.11.JNS10197  
12  
13  
14  
15  
16 12. De Ridder D, Vanneste S, Engineer ND, Kilgard MP. Safety and efficacy of vagus nerve  
17 stimulation paired with tones for the treatment of tinnitus: a case series. *Neuromodulation*  
18 *Technol. Neural Interface* 2014;17(2):170–179. doi: 10.1111/ner.12127.  
19  
20  
21  
22  
23 13. Kreuzer PM, Landgrebe M, Resch M, Husser O, Schecklmann M, Geisreiter F, Poepl TB,  
24 Prasser SJ, Hajak G, Rupprecht R, others. Feasibility, safety and efficacy of transcutaneous  
25 vagus nerve stimulation in chronic tinnitus: an open pilot study. *Brain Stimulat.*  
26 2014;7(5):740–747. doi: 10.1016/j.brs.2014.05.003.  
27  
28  
29  
30  
31 14. Lehtimäki J, Hyvärinen P, Ylikoski M, Bergholm M, Mäkelä JP, Aarnisalo A, Pirvola U, Mäkitie  
32 A, Ylikoski J. Transcutaneous vagus nerve stimulation in tinnitus: a pilot study. *Acta*  
33 *Otolaryngol. (Stockh.)* 2013;133(4):378–382. doi: 10.3109/00016489.2012.750736.  
34  
35  
36  
37 15. Hamilton C, D'Arcy S, Pearlmutter BA, Crispino G, Lalor EC, Conlon BJ. An Investigation of  
38 Feasibility and Safety of Bi-Modal Stimulation for the Treatment of Tinnitus: An Open-Label  
39 Pilot Study: *Neuromodulation Technol. Neural Interface.* 2016;19(8):832-837.  
40 doi:10.1111/ner.12452  
41  
42  
43  
44  
45 16. Shore S, Marks K, Martel D.T, Basura G.J, Roberts L.E, Leyzac K Auditory-Somatosensory  
46 Stimulation Alleviates Tinnitus in Human Subjects. Proc. ARO 40<sup>th</sup> Annual Mid-winter  
47 meeting, Baltimore 2017  
48  
49  
50  
51 17. Engineer ND, Riley JR, Seale JD, Vrana WA, Shetake JA, Sudanagunta SP, Borland MS,  
52 Kilgard MP. Reversing pathological neural activity using targeted plasticity. *Nature*  
53 2011;470(7332):101–104. doi: 10.1038/nature09656.  
54  
55  
56  
57  
58  
59  
60

- 1  
2  
3 18. Kreuzer PMM, Landgrebe M, Husser O, Resch M, Schecklmann M, Geisreiter F, Poepl TB,  
4 Prasser SJ, Hajak G, Langguth B. Transcutaneous Vagus Nerve Stimulation: Retrospective  
5 Assessment of Cardiac Safety in a Pilot Study. *Front. Psychiatry* 2012;3:70.  
6 doi:10.3389/fpsyt.2012.00070  
7  
8  
9  
10  
11 19. Koehler SD, Shore SE. Stimulus Timing-Dependent Plasticity in Dorsal Cochlear Nucleus Is  
12 Altered in Tinnitus. *J. Neurosci.* 2013;33(50):19647–19656. doi:10.1523/JNEUROSCI.2788-  
13 13.2013  
14  
15  
16  
17 20. Chan A-W, Tetzlaff JM, Gøtzsche PC, Altman DG, Mann H, Berlin J, Dickersin K,  
18 Hróbjartsson A, Schulz KF, Parulekar WR, Krlježa-Jerić K, Laupacis A, Moher D. SPIRIT 2013  
19 Explanation and Elaboration: Guidance for protocols of clinical trials. *BMJ* 2013;346:e7586.  
20 doi: 10.1136/bmj.e7586.  
21  
22  
23  
24  
25  
26 21. Spielberger CD, Gorsuch RL, Lushene R, Vagg PR, Jacobs GA. Manual for the State-Trait  
27 Anxiety Inventory. Palo Alto, CA: Consulting Psychologists Press. 1983.  
28  
29  
30  
31 22. Kvaal K, Ulstein I, Nordhus IH, Engedal K. The Spielberger State-Trait Anxiety Inventory  
32 (STAI): the state scale in detecting mental disorders in geriatric patients. *Int J Geriatr*  
33 *Psychiatry* 2005;20(7):629-34.  
34  
35  
36 23. Folstein MF, Folstein SE, McHugh PR. "Mini-mental state". A practical method for grading the  
37 cognitive state of patients for the clinician. *J Psychiatr Res.* 1975;12(3):189-98.  
38 doi:10.1016/0022-3956(75)90026-6  
39  
40  
41  
42 24. Newman CW, Jacobson GP, Spitzer JB. Development of the Tinnitus Handicap Inventory.  
43 *Arch. Otolaryngol. - Head Neck Surg.* 1996;122(2):143–148.  
44 doi:10.1001/archotol.1996.01890140029007  
45  
46  
47  
48  
49 25. Meikle MB, Henry JA, Griest SE, Stewart BJ, Abrams HB, McArdle R, Myers PJ, Newman  
50 CW, Sandridge S, Turk DC, Folmer RL, Frederick EJ, House JW, Jacobson GP, Kinney SE,  
51 Martin WH, Nagler SM, Reich GE, Searchfield G, Sweetow R, Vernon JA. The Tinnitus  
52 Functional Index: Development of a New Clinical Measure for Chronic, Intrusive Tinnitus. *Ear*  
53 *and Hearing.* 2012;33(2):153–176. doi:10.1097/AUD.0b013e31822f67c0  
54  
55  
56  
57  
58  
59  
60

- 1  
2  
3 26. Fackrell, K, Hall DA, Barry JG, Hoare DJ. Psychometric properties of the Tinnitus Functional  
4 Index (TFI): assessment in a UK research volunteer population. *Hearing Research*.  
5 2016;335:220–235. doi: 10.1016/j.heares.2015.09.009.  
6  
7  
8  
9 27. Henry JA, Meikle MB. Psychoacoustic Measures of Tinnitus. *J Am Acad Audiol* 2000;11:138–  
10 155.  
11  
12  
13 28. Henry JA, James KE, Owens K, Zaugg T, Porsov E, Silaski G. Auditory test result  
14 characteristics of subjects with and without tinnitus. *The Journal of Rehabilitation Research*  
15 *and Development* 2009;46(5):619.  
16  
17  
18 29. Adamchic I, Langguth B, Hauptmann C, Alexander Tass, P. Psychometric Evaluation of  
19 Visual Analog Scale for the Assessment of Chronic Tinnitus. *Am. J. Audiol.* 2012;21(2): 215.  
20 doi:10.1044/1059-0889(2012/12-0010)  
21  
22  
23 30. Levine RA. Somatic (craniocervical) tinnitus and the dorsal cochlear nucleus hypothesis. *Am.*  
24 *J. Otolaryngol.* 1999;20(6):351–362. doi:10.1016/S0196-0709(99)90074-1  
25  
26  
27 31. Zeman F, Koller M, Figueiredo R, Azevedo A, Rates M, Coelho C, Kleinjung T, de Ridder D,  
28 Langguth B, Landgrebe M. Tinnitus Handicap Inventory for Evaluating Treatment Effects  
29 Which Changes Are Clinically Relevant? *Otolaryngol. Neck Surg.* 2011;145(2):282–287. doi:  
30 10.1177/0194599811403882.  
31  
32  
33 32. Pocock SJ, Simon R. Sequential treatment assignment with balancing for prognostic factors  
34 in the controlled clinical trial. *Biometrics* 1975;31(1):103–115.  
35  
36  
37 33. Mokkink LB, Terwee CB, Patrick DL, Alonso J, Stratford PW, Knol DL, Bouter LW de Vet  
38 HCW. The COSMIN checklist for assessing the methodological quality of studies on  
39 measurement properties of health status measurement instruments: an international Delphi  
40 study. *Qual Life Res* 2010;19(4):539-49. doi: 10.1007/s11136-010-9606-8.  
41  
42  
43 34. Rubin DB. Multiple imputation for nonresponse in surveys. John Wiley & Sons. 2004.  
44  
45  
46 35. Schafer, J.L., 1997. Analysis of incomplete multivariate data. CRC press.  
47  
48  
49  
50  
51  
52  
53  
54  
55  
56  
57  
58  
59  
60

- 1  
2  
3 36. Schulz KF, Altman DG, Moher D. CONSORT 2010 statement: updated guidelines for  
4 reporting parallel group randomized trials. *PLoS Med.* 2010;7(3):e1000251. doi:  
5 10.1371/journal.pmed.1000251  
6  
7  
8  
9 37. Hall DA, Haider H, Kikidis D, Mielczarek M, Mazurek B, Szczepek AJ, Cederroth CR. Toward  
10 a Global Consensus on Outcome Measures for Clinical Trials in Tinnitus: Report From the  
11 First International Meeting of the COMiT Initiative, November 14, 2014, Amsterdam, The  
12 Netherlands. *Trends Hear.* 2015;19:2331216515580271. doi:10.1177/2331216515580272  
13  
14  
15  
16  
17 38. Hall DA, Haider H, Szczepek AJ, Lau P, Rabau S, Jones-Diette J, Londero A, Edvall NK,  
18 Cederroth CR, Mielczarek M, Fuller T, Batuecas-Caletrio A, Brueggemen P, Thompson  
19 DM, Norena A, Cima RF, Mehta RL, Mazurek B. Systematic review of outcome domains and  
20 instruments used in clinical trials of tinnitus treatments in adults. *Trials* 2016;17(1):270. doi:  
21 10.1186/s13063-016-1399-9.  
22  
23  
24  
25  
26  
27 39. Landgrebe M, Azevedo A, Baguley D, Bauer C, Cacace A, Coelho C, Dornhoffer J,  
28 Figueiredo R, Flor H, Hajak G, van de Heyning P, Hiller W, Khedr E, Kleinjung T, Koller M,  
29 Lainez JM, Londero A, Martin WH, Mennemeier M, Piccirillo J, De Ridder D, Rupprecht R,  
30 Searchfield G, Vanneste S, Zeman F, Langguth B. Methodological aspects of clinical trials in  
31 tinnitus: A proposal for an international standard. *J. Psychosom. Res.* 2012;73(2):112–121.  
32 doi:10.1016/j.jpsychores.2012.05.002  
33  
34  
35  
36  
37  
38  
39

40 **Figures:**

41  
42 Figure 1: Anticipated flow of participants through the TENT study  
43  
44  
45  
46  
47  
48  
49  
50  
51  
52  
53  
54  
55  
56  
57  
58  
59  
60



1  
2  
3  
4  
5  
6  
7  
8  
9  
10  
11  
12  
13  
14  
15  
16  
17  
18  
19  
20  
21  
22  
23  
24  
25  
26  
27  
28  
29  
30  
31  
32  
33  
34  
35  
36  
37  
38  
39  
40  
41  
42  
43  
44  
45  
46  
47  
48  
49  
50  
51  
52  
53  
54  
55  
56  
57  
58  
59  
60

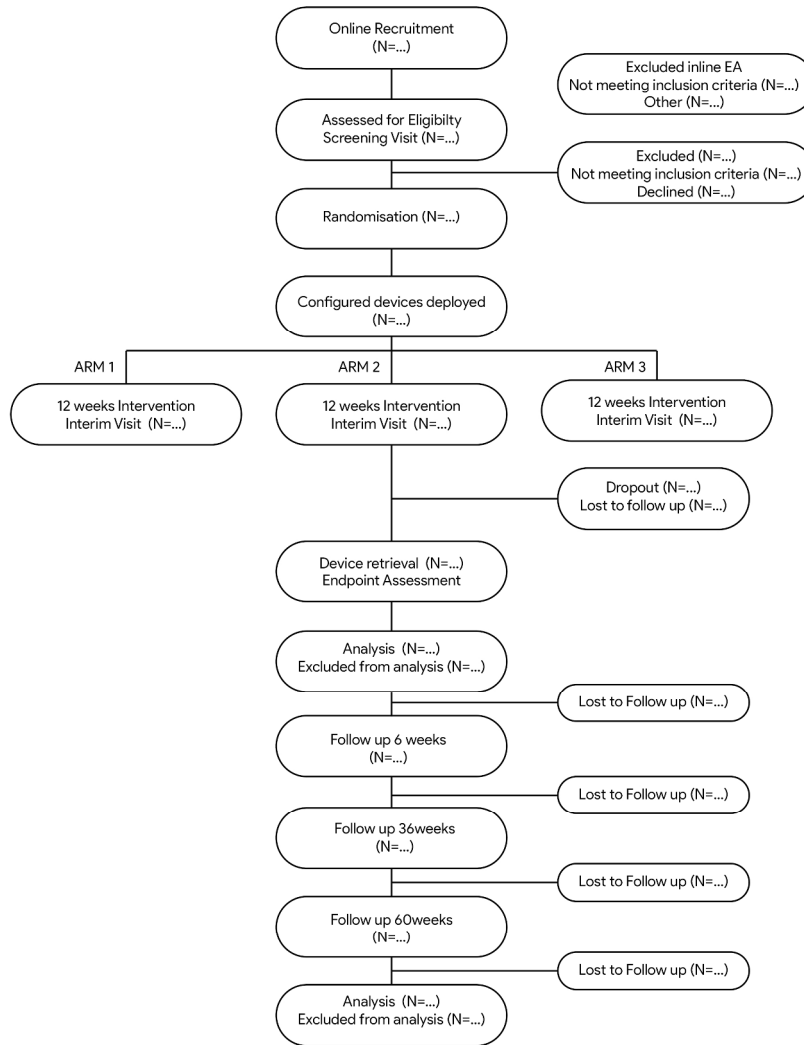

Anticipated flow of participants through the TENT study

209x297mm (300 x 300 DPI)



SPIRIT 2013 Checklist: Recommended items to address in a clinical trial protocol and related documents\*

**\*while these items are not described in the manuscript they are addressed in our protocol, the study has been designed in line with GCP, SPIRIT and ISO14155 guidelines.**

| Section/item                      | Item No | Description                                                                                                                                                                                                                                                                              | Addressed on page number    |
|-----------------------------------|---------|------------------------------------------------------------------------------------------------------------------------------------------------------------------------------------------------------------------------------------------------------------------------------------------|-----------------------------|
| <b>Administrative information</b> |         |                                                                                                                                                                                                                                                                                          |                             |
| Title                             | 1       | Descriptive title identifying the study design, population, interventions, and, if applicable, trial acronym                                                                                                                                                                             | 1                           |
| Trial registration                | 2a      | Trial identifier and registry name. If not yet registered, name of intended registry                                                                                                                                                                                                     | 3                           |
|                                   | 2b      | All items from the World Health Organization Trial Registration Data Set                                                                                                                                                                                                                 | N/A                         |
| Protocol version                  | 3       | Date and version identifier                                                                                                                                                                                                                                                              | Not reported in manuscript* |
| Funding                           | 4       | Sources and types of financial, material, and other support                                                                                                                                                                                                                              | 3                           |
| Roles and responsibilities        | 5a      | Names, affiliations, and roles of protocol contributors                                                                                                                                                                                                                                  | 1                           |
|                                   | 5b      | Name and contact information for the trial sponsor                                                                                                                                                                                                                                       | 3                           |
|                                   | 5c      | Role of study sponsor and funders, if any, in study design; collection, management, analysis, and interpretation of data; writing of the report; and the decision to submit the report for publication, including whether they will have ultimate authority over any of these activities | 16                          |

|    |                                                           |     |                                                                                                                                                                                                                                                                  |
|----|-----------------------------------------------------------|-----|------------------------------------------------------------------------------------------------------------------------------------------------------------------------------------------------------------------------------------------------------------------|
| 1  |                                                           |     |                                                                                                                                                                                                                                                                  |
| 2  |                                                           |     |                                                                                                                                                                                                                                                                  |
| 3  |                                                           | 5d  | Composition, roles, and responsibilities of the coordinating centre, steering committee, endpoint adjudication committee, data management team, and other individuals or groups overseeing the trial, if applicable (see Item 21a for data monitoring committee) |
| 4  |                                                           |     | Not reported in manuscript                                                                                                                                                                                                                                       |
| 5  |                                                           |     |                                                                                                                                                                                                                                                                  |
| 6  |                                                           |     |                                                                                                                                                                                                                                                                  |
| 7  |                                                           |     |                                                                                                                                                                                                                                                                  |
| 8  |                                                           |     |                                                                                                                                                                                                                                                                  |
| 9  |                                                           |     |                                                                                                                                                                                                                                                                  |
| 10 |                                                           |     |                                                                                                                                                                                                                                                                  |
| 11 | <b>Introduction</b>                                       |     |                                                                                                                                                                                                                                                                  |
| 12 |                                                           |     |                                                                                                                                                                                                                                                                  |
| 13 | Background and rationale                                  | 6a  | Description of research question and justification for undertaking the trial, including summary of relevant studies (published and unpublished) examining benefits and harms for each intervention                                                               |
| 14 |                                                           |     | 4-5                                                                                                                                                                                                                                                              |
| 15 |                                                           | 6b  | Explanation for choice of comparators                                                                                                                                                                                                                            |
| 16 |                                                           |     | 5                                                                                                                                                                                                                                                                |
| 17 | Objectives                                                | 7   | Specific objectives or hypotheses                                                                                                                                                                                                                                |
| 18 |                                                           |     | 5                                                                                                                                                                                                                                                                |
| 19 | Trial design                                              | 8   | Description of trial design including type of trial (eg, parallel group, crossover, factorial, single group), allocation ratio, and framework (eg, superiority, equivalence, noninferiority, exploratory)                                                        |
| 20 |                                                           |     | 5-6                                                                                                                                                                                                                                                              |
| 21 |                                                           |     |                                                                                                                                                                                                                                                                  |
| 22 |                                                           |     |                                                                                                                                                                                                                                                                  |
| 23 |                                                           |     |                                                                                                                                                                                                                                                                  |
| 24 | <b>Methods: Participants, interventions, and outcomes</b> |     |                                                                                                                                                                                                                                                                  |
| 25 |                                                           |     |                                                                                                                                                                                                                                                                  |
| 26 | Study setting                                             | 9   | Description of study settings (eg, community clinic, academic hospital) and list of countries where data will be collected. Reference to where list of study sites can be obtained                                                                               |
| 27 |                                                           |     | 6                                                                                                                                                                                                                                                                |
| 28 | Eligibility criteria                                      | 10  | Inclusion and exclusion criteria for participants. If applicable, eligibility criteria for study centres and individuals who will perform the interventions (eg, surgeons, psychotherapists)                                                                     |
| 29 |                                                           |     | 6                                                                                                                                                                                                                                                                |
| 30 | Interventions                                             | 11a | Interventions for each group with sufficient detail to allow replication, including how and when they will be administered                                                                                                                                       |
| 31 |                                                           |     | Table 1                                                                                                                                                                                                                                                          |
| 32 |                                                           | 11b | Criteria for discontinuing or modifying allocated interventions for a given trial participant (eg, drug dose change in response to harms, participant request, or improving/worsening disease)                                                                   |
| 33 |                                                           |     | 9                                                                                                                                                                                                                                                                |
| 34 |                                                           | 11c | Strategies to improve adherence to intervention protocols, and any procedures for monitoring adherence (eg, drug tablet return, laboratory tests)                                                                                                                |
| 35 |                                                           |     | 11                                                                                                                                                                                                                                                               |
| 36 |                                                           | 11d | Relevant concomitant care and interventions that are permitted or prohibited during the trial                                                                                                                                                                    |
| 37 |                                                           |     | N/A                                                                                                                                                                                                                                                              |
| 38 |                                                           |     |                                                                                                                                                                                                                                                                  |
| 39 |                                                           |     |                                                                                                                                                                                                                                                                  |
| 40 |                                                           |     |                                                                                                                                                                                                                                                                  |
| 41 |                                                           |     |                                                                                                                                                                                                                                                                  |
| 42 |                                                           |     |                                                                                                                                                                                                                                                                  |
| 43 |                                                           |     |                                                                                                                                                                                                                                                                  |
| 44 |                                                           |     |                                                                                                                                                                                                                                                                  |
| 45 |                                                           |     |                                                                                                                                                                                                                                                                  |
| 46 |                                                           |     |                                                                                                                                                                                                                                                                  |
| 47 |                                                           |     |                                                                                                                                                                                                                                                                  |
| 48 |                                                           |     |                                                                                                                                                                                                                                                                  |
| 49 |                                                           |     |                                                                                                                                                                                                                                                                  |

|    |                      |    |                                                                                                                                                                                                                                                                                                                                                                                |                |
|----|----------------------|----|--------------------------------------------------------------------------------------------------------------------------------------------------------------------------------------------------------------------------------------------------------------------------------------------------------------------------------------------------------------------------------|----------------|
| 1  |                      |    |                                                                                                                                                                                                                                                                                                                                                                                |                |
| 2  |                      |    |                                                                                                                                                                                                                                                                                                                                                                                |                |
| 3  | Outcomes             | 12 | Primary, secondary, and other outcomes, including the specific measurement variable (eg, systolic blood pressure), analysis metric (eg, change from baseline, final value, time to event), method of aggregation (eg, median, proportion), and time point for each outcome. Explanation of the clinical relevance of chosen efficacy and harm outcomes is strongly recommended | 8              |
| 4  |                      |    |                                                                                                                                                                                                                                                                                                                                                                                |                |
| 5  |                      |    |                                                                                                                                                                                                                                                                                                                                                                                |                |
| 6  |                      |    |                                                                                                                                                                                                                                                                                                                                                                                |                |
| 7  |                      |    |                                                                                                                                                                                                                                                                                                                                                                                |                |
| 8  | Participant timeline | 13 | Time schedule of enrolment, interventions (including any run-ins and washouts), assessments, and visits for participants. A schematic diagram is highly recommended (see Figure)                                                                                                                                                                                               | 11-12, Table 2 |
| 9  |                      |    |                                                                                                                                                                                                                                                                                                                                                                                |                |
| 10 |                      |    |                                                                                                                                                                                                                                                                                                                                                                                |                |
| 11 | Sample size          | 14 | Estimated number of participants needed to achieve study objectives and how it was determined, including clinical and statistical assumptions supporting any sample size calculations                                                                                                                                                                                          | 12             |
| 12 |                      |    |                                                                                                                                                                                                                                                                                                                                                                                |                |
| 13 |                      |    |                                                                                                                                                                                                                                                                                                                                                                                |                |
| 14 | Recruitment          | 15 | Strategies for achieving adequate participant enrolment to reach target sample size                                                                                                                                                                                                                                                                                            | 10             |
| 15 |                      |    |                                                                                                                                                                                                                                                                                                                                                                                |                |
| 16 |                      |    |                                                                                                                                                                                                                                                                                                                                                                                |                |

### 17 **Methods: Assignment of interventions (for controlled trials)**

#### 18 Allocation:

|    |                                  |     |                                                                                                                                                                                                                                                                                                                                                          |                            |
|----|----------------------------------|-----|----------------------------------------------------------------------------------------------------------------------------------------------------------------------------------------------------------------------------------------------------------------------------------------------------------------------------------------------------------|----------------------------|
| 19 |                                  |     |                                                                                                                                                                                                                                                                                                                                                          |                            |
| 20 |                                  |     |                                                                                                                                                                                                                                                                                                                                                          |                            |
| 21 | Sequence generation              | 16a | Method of generating the allocation sequence (eg, computer-generated random numbers), and list of any factors for stratification. To reduce predictability of a random sequence, details of any planned restriction (eg, blocking) should be provided in a separate document that is unavailable to those who enrol participants or assign interventions | 12                         |
| 22 |                                  |     |                                                                                                                                                                                                                                                                                                                                                          |                            |
| 23 |                                  |     |                                                                                                                                                                                                                                                                                                                                                          |                            |
| 24 |                                  |     |                                                                                                                                                                                                                                                                                                                                                          |                            |
| 25 |                                  |     |                                                                                                                                                                                                                                                                                                                                                          |                            |
| 26 | Allocation concealment mechanism | 16b | Mechanism of implementing the allocation sequence (eg, central telephone; sequentially numbered, opaque, sealed envelopes), describing any steps to conceal the sequence until interventions are assigned                                                                                                                                                | 12, 13                     |
| 27 |                                  |     |                                                                                                                                                                                                                                                                                                                                                          |                            |
| 28 |                                  |     |                                                                                                                                                                                                                                                                                                                                                          |                            |
| 29 |                                  |     |                                                                                                                                                                                                                                                                                                                                                          |                            |
| 30 | Implementation                   | 16c | Who will generate the allocation sequence, who will enrol participants, and who will assign participants to interventions                                                                                                                                                                                                                                | 12                         |
| 31 |                                  |     |                                                                                                                                                                                                                                                                                                                                                          |                            |
| 32 |                                  |     |                                                                                                                                                                                                                                                                                                                                                          |                            |
| 33 |                                  |     |                                                                                                                                                                                                                                                                                                                                                          |                            |
| 34 | Blinding (masking)               | 17a | Who will be blinded after assignment to interventions (eg, trial participants, care providers, outcome assessors, data analysts), and how                                                                                                                                                                                                                | 13                         |
| 35 |                                  |     |                                                                                                                                                                                                                                                                                                                                                          |                            |
| 36 |                                  |     |                                                                                                                                                                                                                                                                                                                                                          |                            |
| 37 |                                  | 17b | If blinded, circumstances under which unblinding is permissible, and procedure for revealing a participant's allocated intervention during the trial                                                                                                                                                                                                     | Not reported in manuscript |
| 38 |                                  |     |                                                                                                                                                                                                                                                                                                                                                          |                            |
| 39 |                                  |     |                                                                                                                                                                                                                                                                                                                                                          |                            |

### 40 **Methods: Data collection, management, and analysis**

|    |                                 |     |                                                                                                               |                 |
|----|---------------------------------|-----|---------------------------------------------------------------------------------------------------------------|-----------------|
| 1  |                                 |     |                                                                                                               |                 |
| 2  |                                 |     |                                                                                                               |                 |
| 3  | Data collection                 | 18a | Plans for assessment and collection of outcome, baseline, and other trial data, including any related         | 13              |
| 4  | methods                         |     | processes to promote data quality (eg, duplicate measurements, training of assessors) and a description of    |                 |
| 5  |                                 |     | study instruments (eg, questionnaires, laboratory tests) along with their reliability and validity, if known. |                 |
| 6  |                                 |     | Reference to where data collection forms can be found, if not in the protocol                                 |                 |
| 7  |                                 |     |                                                                                                               |                 |
| 8  |                                 | 18b | Plans to promote participant retention and complete follow-up, including list of any outcome data to be       | Not reported in |
| 9  |                                 |     | collected for participants who discontinue or deviate from intervention protocols                             | manuscript      |
| 10 |                                 |     |                                                                                                               |                 |
| 11 | Data management                 | 19  | Plans for data entry, coding, security, and storage, including any related processes to promote data quality  | 13              |
| 12 |                                 |     | (eg, double data entry; range checks for data values). Reference to where details of data management          |                 |
| 13 |                                 |     | procedures can be found, if not in the protocol                                                               |                 |
| 14 |                                 |     |                                                                                                               |                 |
| 15 | Statistical methods             | 20a | Statistical methods for analysing primary and secondary outcomes. Reference to where other details of the     | 13-14           |
| 16 |                                 |     | statistical analysis plan can be found, if not in the protocol                                                |                 |
| 17 |                                 |     |                                                                                                               |                 |
| 18 |                                 | 20b | Methods for any additional analyses (eg, subgroup and adjusted analyses)                                      | 14              |
| 19 |                                 |     |                                                                                                               |                 |
| 20 |                                 | 20c | Definition of analysis population relating to protocol non-adherence (eg, as randomised analysis), and any    |                 |
| 21 |                                 |     | statistical methods to handle missing data (eg, multiple imputation)                                          | 14              |
| 22 |                                 |     |                                                                                                               |                 |
| 23 |                                 |     |                                                                                                               |                 |
| 24 | <b>Methods: Monitoring</b>      |     |                                                                                                               |                 |
| 25 |                                 |     |                                                                                                               |                 |
| 26 | Data monitoring                 | 21a | Composition of data monitoring committee (DMC); summary of its role and reporting structure; statement of     | Not reported in |
| 27 |                                 |     | whether it is independent from the sponsor and competing interests; and reference to where further details    | manuscript      |
| 28 |                                 |     | about its charter can be found, if not in the protocol. Alternatively, an explanation of why a DMC is not     |                 |
| 29 |                                 |     | needed                                                                                                        |                 |
| 30 |                                 |     |                                                                                                               |                 |
| 31 |                                 | 21b | Description of any interim analyses and stopping guidelines, including who will have access to these interim  | 9, 14           |
| 32 |                                 |     | results and make the final decision to terminate the trial                                                    |                 |
| 33 |                                 |     |                                                                                                               |                 |
| 34 |                                 |     |                                                                                                               |                 |
| 35 | Harms                           | 22  | Plans for collecting, assessing, reporting, and managing solicited and spontaneously reported adverse         | 9               |
| 36 |                                 |     | events and other unintended effects of trial interventions or trial conduct                                   |                 |
| 37 |                                 |     |                                                                                                               |                 |
| 38 | Auditing                        | 23  | Frequency and procedures for auditing trial conduct, if any, and whether the process will be independent      | Not reported in |
| 39 |                                 |     | from investigators and the sponsor                                                                            | manuscript      |
| 40 |                                 |     |                                                                                                               |                 |
| 41 |                                 |     |                                                                                                               |                 |
| 42 | <b>Ethics and dissemination</b> |     |                                                                                                               |                 |
| 43 |                                 |     |                                                                                                               |                 |
| 44 |                                 |     |                                                                                                               |                 |
| 45 |                                 |     |                                                                                                               |                 |
| 46 |                                 |     |                                                                                                               |                 |
| 47 |                                 |     |                                                                                                               |                 |
| 48 |                                 |     |                                                                                                               |                 |
| 49 |                                 |     |                                                                                                               |                 |

|    |                               |     |                                                                                                                                                                                                                                                                                     |                            |
|----|-------------------------------|-----|-------------------------------------------------------------------------------------------------------------------------------------------------------------------------------------------------------------------------------------------------------------------------------------|----------------------------|
| 1  |                               |     |                                                                                                                                                                                                                                                                                     |                            |
| 2  |                               |     |                                                                                                                                                                                                                                                                                     |                            |
| 3  | Research ethics approval      | 24  | Plans for seeking research ethics committee/institutional review board (REC/IRB) approval                                                                                                                                                                                           | 6                          |
| 4  |                               |     |                                                                                                                                                                                                                                                                                     |                            |
| 5  |                               |     |                                                                                                                                                                                                                                                                                     |                            |
| 6  | Protocol amendments           | 25  | Plans for communicating important protocol modifications (eg, changes to eligibility criteria, outcomes, analyses) to relevant parties (eg, investigators, REC/IRBs, trial participants, trial registries, journals, regulators)                                                    | Not reported in manuscript |
| 7  |                               |     |                                                                                                                                                                                                                                                                                     |                            |
| 8  |                               |     |                                                                                                                                                                                                                                                                                     |                            |
| 9  |                               |     |                                                                                                                                                                                                                                                                                     |                            |
| 10 | Consent or assent             | 26a | Who will obtain informed consent or assent from potential trial participants or authorised surrogates, and how (see Item 32)                                                                                                                                                        | Not reported in manuscript |
| 11 |                               |     |                                                                                                                                                                                                                                                                                     |                            |
| 12 |                               |     |                                                                                                                                                                                                                                                                                     |                            |
| 13 |                               | 26b | Additional consent provisions for collection and use of participant data and biological specimens in ancillary studies, if applicable                                                                                                                                               | N/A                        |
| 14 |                               |     |                                                                                                                                                                                                                                                                                     |                            |
| 15 |                               |     |                                                                                                                                                                                                                                                                                     |                            |
| 16 | Confidentiality               | 27  | How personal information about potential and enrolled participants will be collected, shared, and maintained in order to protect confidentiality before, during, and after the trial                                                                                                | 10, 13                     |
| 17 |                               |     |                                                                                                                                                                                                                                                                                     |                            |
| 18 |                               |     |                                                                                                                                                                                                                                                                                     |                            |
| 19 | Declaration of interests      | 28  | Financial and other competing interests for principal investigators for the overall trial and each study site                                                                                                                                                                       | 16                         |
| 20 |                               |     |                                                                                                                                                                                                                                                                                     |                            |
| 21 |                               |     |                                                                                                                                                                                                                                                                                     |                            |
| 22 | Access to data                | 29  | Statement of who will have access to the final trial dataset, and disclosure of contractual agreements that limit such access for investigators                                                                                                                                     | Not reported in manuscript |
| 23 |                               |     |                                                                                                                                                                                                                                                                                     |                            |
| 24 |                               |     |                                                                                                                                                                                                                                                                                     |                            |
| 25 | Ancillary and post-trial care | 30  | Provisions, if any, for ancillary and post-trial care, and for compensation to those who suffer harm from trial participation                                                                                                                                                       | Not reported in manuscript |
| 26 |                               |     |                                                                                                                                                                                                                                                                                     |                            |
| 27 |                               |     |                                                                                                                                                                                                                                                                                     |                            |
| 28 |                               |     |                                                                                                                                                                                                                                                                                     |                            |
| 29 | Dissemination policy          | 31a | Plans for investigators and sponsor to communicate trial results to participants, healthcare professionals, the public, and other relevant groups (eg, via publication, reporting in results databases, or other data sharing arrangements), including any publication restrictions | 1                          |
| 30 |                               |     |                                                                                                                                                                                                                                                                                     |                            |
| 31 |                               |     |                                                                                                                                                                                                                                                                                     |                            |
| 32 |                               |     |                                                                                                                                                                                                                                                                                     |                            |
| 33 |                               | 31b | Authorship eligibility guidelines and any intended use of professional writers                                                                                                                                                                                                      | N/A                        |
| 34 |                               |     |                                                                                                                                                                                                                                                                                     |                            |
| 35 |                               | 31c | Plans, if any, for granting public access to the full protocol, participant-level dataset, and statistical code                                                                                                                                                                     | 16                         |
| 36 |                               |     |                                                                                                                                                                                                                                                                                     |                            |
| 37 | <b>Appendices</b>             |     |                                                                                                                                                                                                                                                                                     |                            |
| 38 |                               |     |                                                                                                                                                                                                                                                                                     |                            |
| 39 | Informed consent materials    | 32  | Model consent form and other related documentation given to participants and authorised surrogates                                                                                                                                                                                  | Not reported in manuscript |
| 40 |                               |     |                                                                                                                                                                                                                                                                                     |                            |
| 41 |                               |     |                                                                                                                                                                                                                                                                                     |                            |
| 42 |                               |     |                                                                                                                                                                                                                                                                                     |                            |
| 43 |                               |     |                                                                                                                                                                                                                                                                                     |                            |
| 44 |                               |     |                                                                                                                                                                                                                                                                                     |                            |
| 45 |                               |     |                                                                                                                                                                                                                                                                                     |                            |
| 46 |                               |     |                                                                                                                                                                                                                                                                                     |                            |
| 47 |                               |     |                                                                                                                                                                                                                                                                                     |                            |
| 48 |                               |     |                                                                                                                                                                                                                                                                                     |                            |
| 49 |                               |     |                                                                                                                                                                                                                                                                                     |                            |

1  
2  
3  
4  
5  
6  
7  
8  
9  
10  
11  
12  
13  
14  
15  
16  
17  
18  
19  
20  
21  
22  
23  
24  
25  
26  
27  
28  
29  
30  
31  
32  
33  
34  
35  
36  
37  
38  
39  
40  
41  
42  
43  
44  
45  
46  
47  
48  
49

|                      |    |                                                                                                                                                                                                |     |
|----------------------|----|------------------------------------------------------------------------------------------------------------------------------------------------------------------------------------------------|-----|
| Biological specimens | 33 | Plans for collection, laboratory evaluation, and storage of biological specimens for genetic or molecular analysis in the current trial and for future use in ancillary studies, if applicable | N/A |
|----------------------|----|------------------------------------------------------------------------------------------------------------------------------------------------------------------------------------------------|-----|

---

\*It is strongly recommended that this checklist be read in conjunction with the SPIRIT 2013 Explanation & Elaboration for important clarification on the items. Amendments to the protocol should be tracked and dated. The SPIRIT checklist is copyrighted by the SPIRIT Group under the Creative Commons "[Attribution-NonCommercial-NoDerivs 3.0 Unported](#)" license.

For peer review only
